# Supplementary material for: A new synthetic approach to the imidazo[1,5-a]imidazole-2-one scaffold and effective functionalization through Suzuki–Miyaura cross coupling reactions
Source: Royal Society of Chemistry journal article supplement (doi:10.1039/c5ra25520a), 2016-01-01

Supporting Information

**A new synthetic approach to the imidazo[1,5-*a*]imidazol-2-one scaffold  
and effective functionalization through Suzuki-Miyaura cross coupling  
reactions**

M. Loubidi,<sup>a,b</sup> C. Pillard,<sup>c</sup> A. El Hakmaoui,<sup>b</sup> P. Bernard,<sup>c</sup> M. Akssira,<sup>\*b</sup> and G. Guillaumet.<sup>\*a</sup>

| Table of contents                                                                                                  | page |
|--------------------------------------------------------------------------------------------------------------------|------|
| <sup>1</sup> H and <sup>13</sup> C NMR spectrum compounds                                                          |      |
| 4,5-Dibromo-2-methyl-1H-imidazole (2).....                                                                         | 2    |
| 2-Bromo-N-(4-methoxybenzyl)acetamide (4).....                                                                      | 3    |
| 2-(4,5-Dibromo-2-methyl-1H-imidazol-1-yl)-N-(4-methoxybenzyl) acetamide (5).....                                   | 4    |
| 7-Bromo-1-(4-methoxybenzyl)-5-methyl-1H-imidazo[1,5- <i>a</i> ]imidazol-2(3H)-one (6).....                         | 5    |
| 1-(4-Methoxybenzyl)-5-methyl-7-( <i>p</i> -tolyl)-1H-imidazo[1,5- <i>a</i> ]imidazol-2(3H)-one (7).....            | 6    |
| 1-(4-Methoxybenzyl)-7-(4-methoxyphenyl)-5-methyl-1H-imidazo[1,5- <i>a</i> ]imidazol-2(3H)-one. (8).....            | 7    |
| 7-(3,5-Dimethoxyphenyl)-1-(4-methoxybenzyl)-5-methyl-1H-imidazo[1,5- <i>a</i> ]imidazol-2(3H)-one (9).....         | 8    |
| Ethyl 4-(1-(4-methoxybenzyl)-5-methyl-2-oxo-2,3-dihydro-1H-imidazo[1,5- <i>a</i> ]imidazol-7-yl)benzoate (10)..... | 9    |
| 1-(4-Methoxybenzyl)-5-methyl-7-(4-nitrophenyl)-1H-imidazo[1,5- <i>a</i> ]imidazol-2(3H)-one (11).....              | 10   |
| 1-(4-Methoxybenzyl)-5-methyl-7-(4-(trifluoromethyl)phenyl)-1H-imidazo[1,5- <i>a</i> ]imidazol-2(3H)-one (12).....  | 11   |
| 4-(1-(4-Methoxybenzyl)-5-methyl-2-oxo-2,3-dihydro-1H-imidazo[1,5- <i>a</i> ]imidazol-7-yl)benzotrile (13).....     | 12   |
| 1-(4-Methoxybenzyl)-5-methyl-7-phenyl-1H-imidazo[1,5- <i>a</i> ]imidazol-2(3H)-one (14).....                       | 13   |
| 1-(4-Methoxybenzyl)-5-methyl-7-( <i>m</i> -tolyl)-1H-imidazo[1,5- <i>a</i> ]imidazol-2(3H)-one (15).....           | 13   |
| 1-(4-Methoxybenzyl)-5-methyl-7-(3-nitrophenyl)-1H-imidazo[1,5- <i>a</i> ]imidazol-2(3H)-one (16).....              | 15   |
| 1-(4-Methoxybenzyl)-5-methyl-7-(3-(trifluoromethyl)phenyl)-1H-imidazo[1,5- <i>a</i> ]imidazol-2(3H)-one (17).....  | 16   |
| 3-(1-(4-Methoxybenzyl)-5-methyl-2-oxo-2,3-dihydro-1H-imidazo[1,5- <i>a</i> ]imidazol-7-yl)benzotrile (18).....     | 17   |
| 1-(4-Methoxybenzyl)-5-methyl-1H-imidazo[1,5- <i>a</i> ]imidazol-2(3H)-one (19).....                                | 18   |
| (E)-1-(4-Methoxybenzyl)-5-methyl-7-styryl-1H-imidazo[1,5- <i>a</i> ]imidazol-2(3H)-one (20).....                   | 19   |
| 7-(Furan-3-yl)-1-(4-methoxybenzyl)-5-methyl-1H-imidazo[1,5- <i>a</i> ]imidazol-2(3H)-one (21).....                 | 20   |
| 1-(4-Methoxybenzyl)-5-methyl-7-(thiophen-3-yl)-1H-imidazo[1,5- <i>a</i> ]imidazol-2(3H)-one (22).....              | 21   |

## 4,5-Dibromo-2-methyl-1H-imidazole (2)

$^1\text{H}$  NMR (400 MHz,  $\text{DMSO-d}_6$ ):  $\delta$

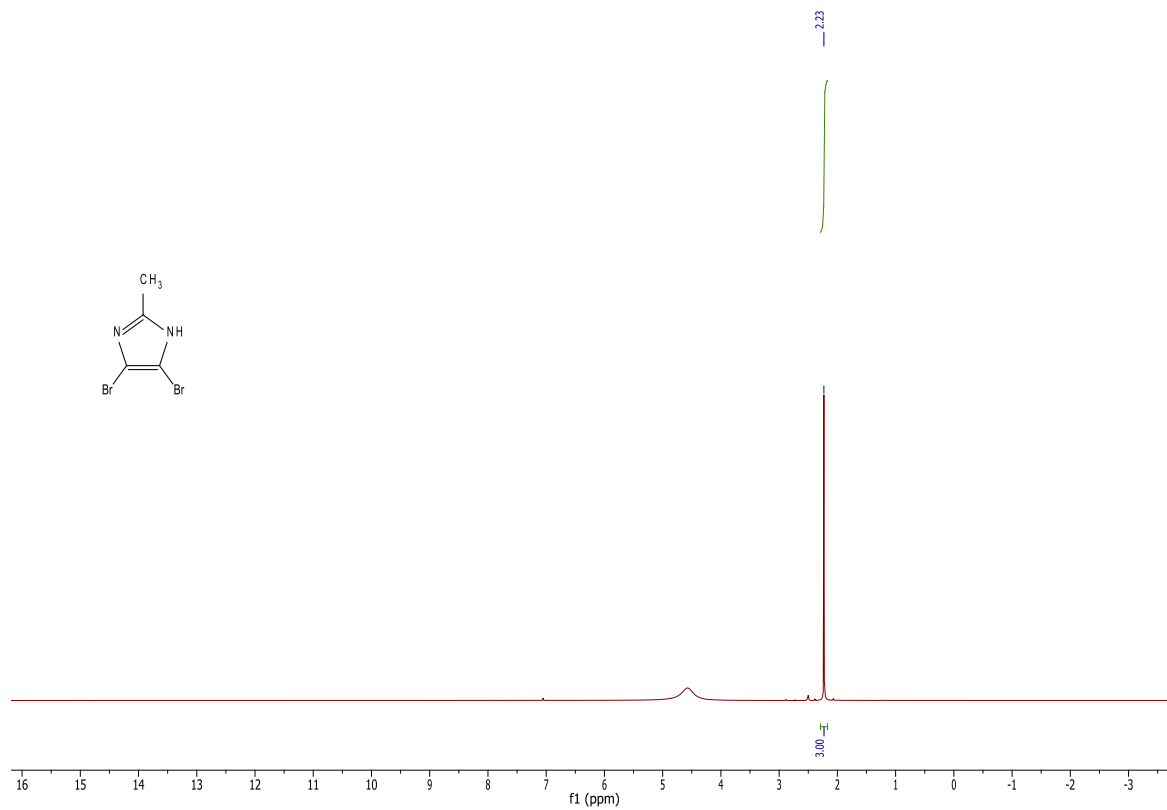

$^{13}\text{C}$  NMR (101 MHz,  $\text{DMSO-d}_6$ ):  $\delta$

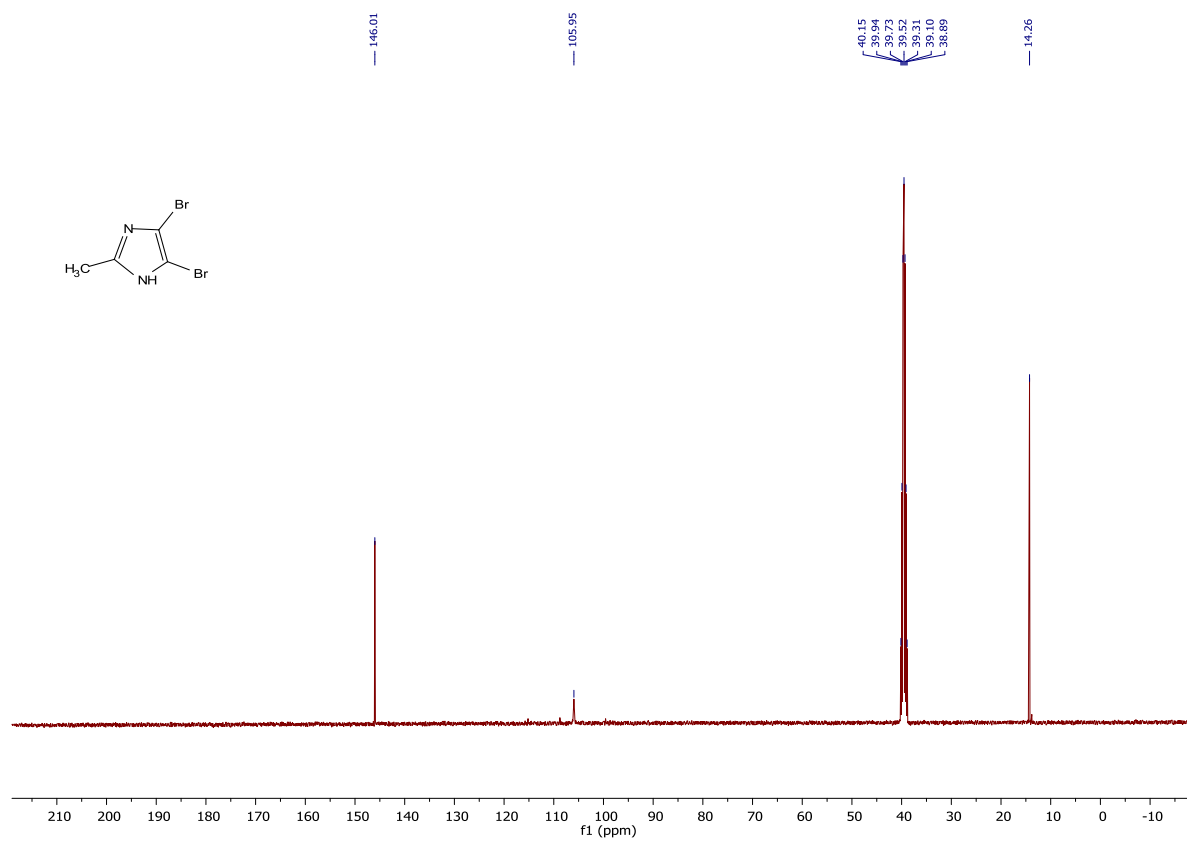

### 2-Bromo-*N*-(4-methoxybenzyl)acetamide (4)

$^1\text{H}$  NMR (400 MHz,  $\text{CDCl}_3$ ):  $\delta$

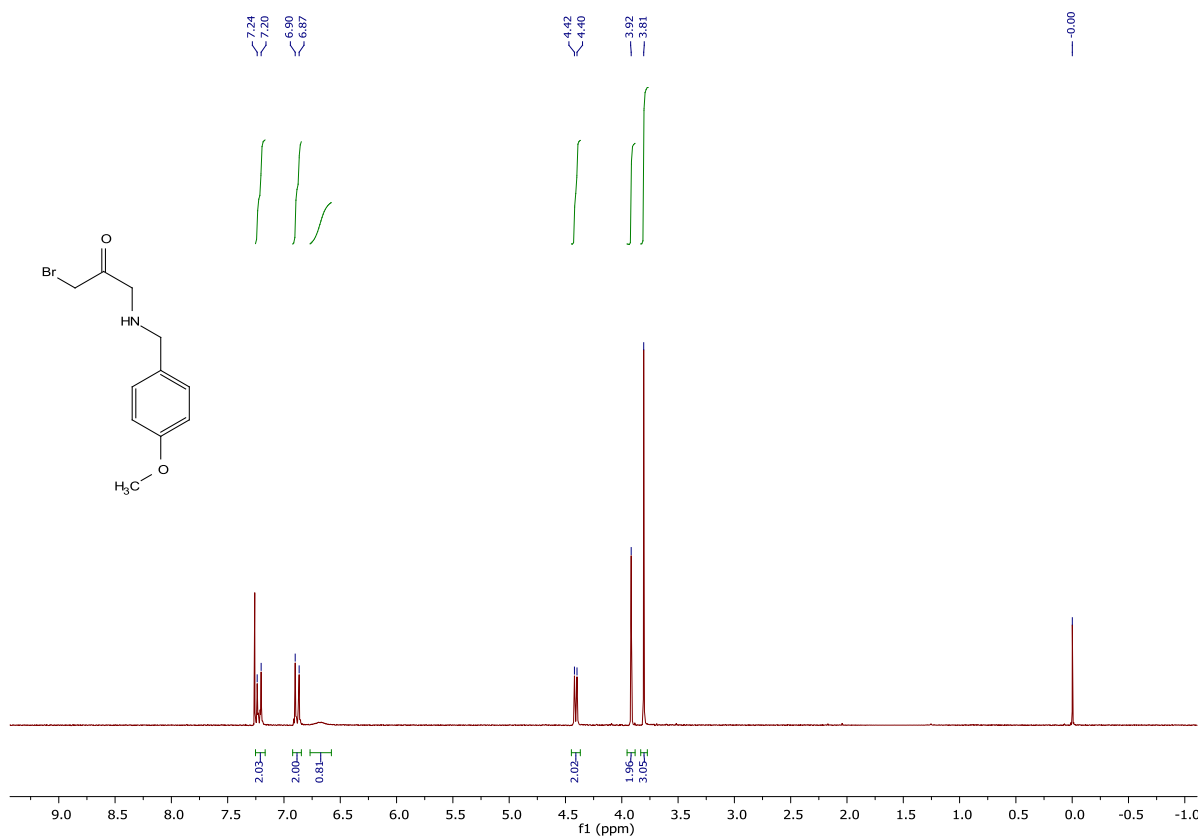

$^{13}\text{C}$  NMR (101 MHz, DMSO):  $\delta$

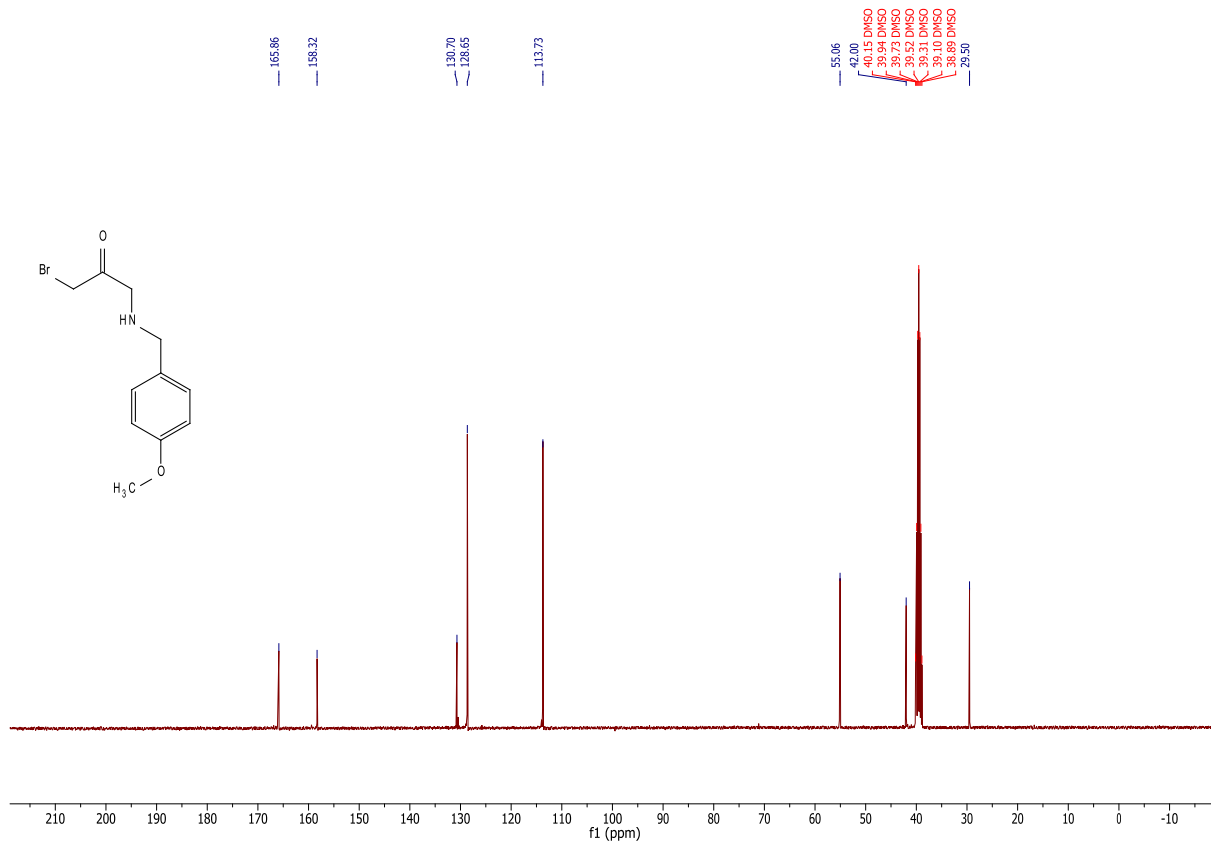

**2-(4,5-Dibromo-2-methyl-1H-imidazol-1-yl)-N-(4-methoxybenzyl) acetamide (5).**

<sup>1</sup>H NMR (250 MHz, DMSO-d<sub>6</sub>): δ

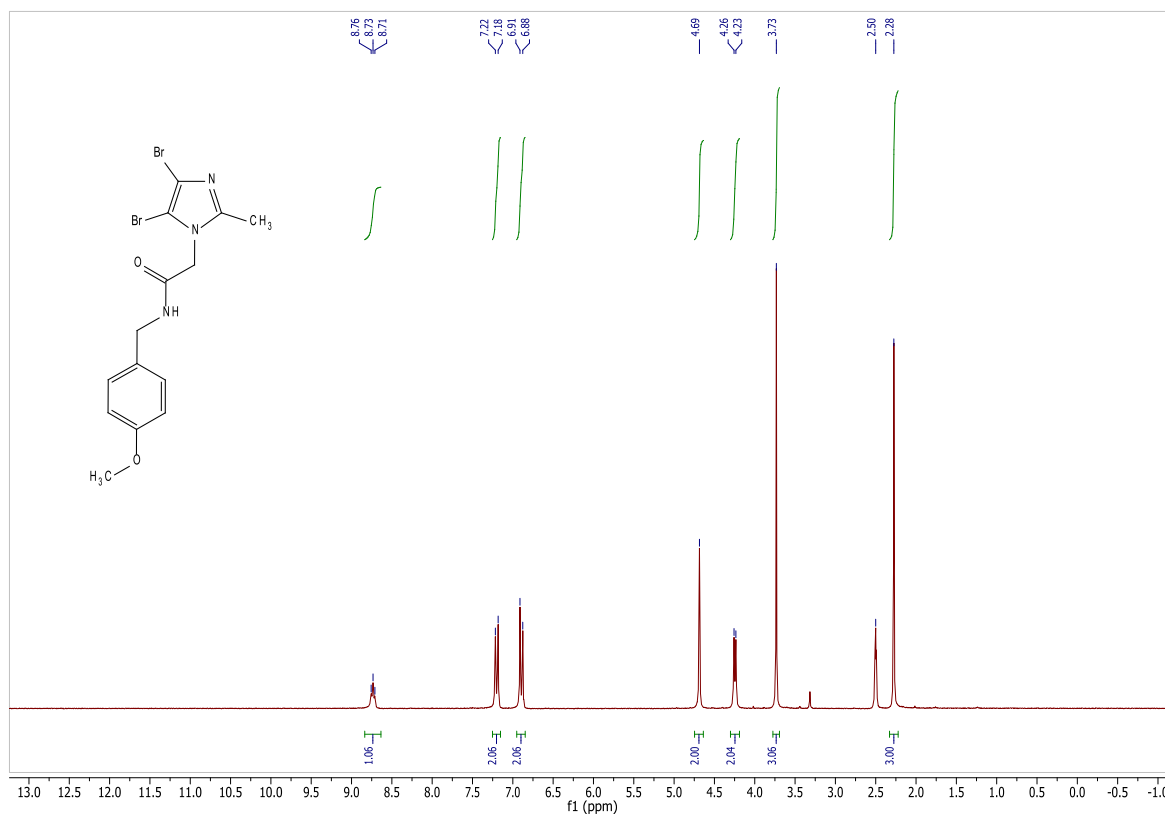

<sup>13</sup>C NMR (101 MHz, DMSO-d<sub>6</sub>): δ

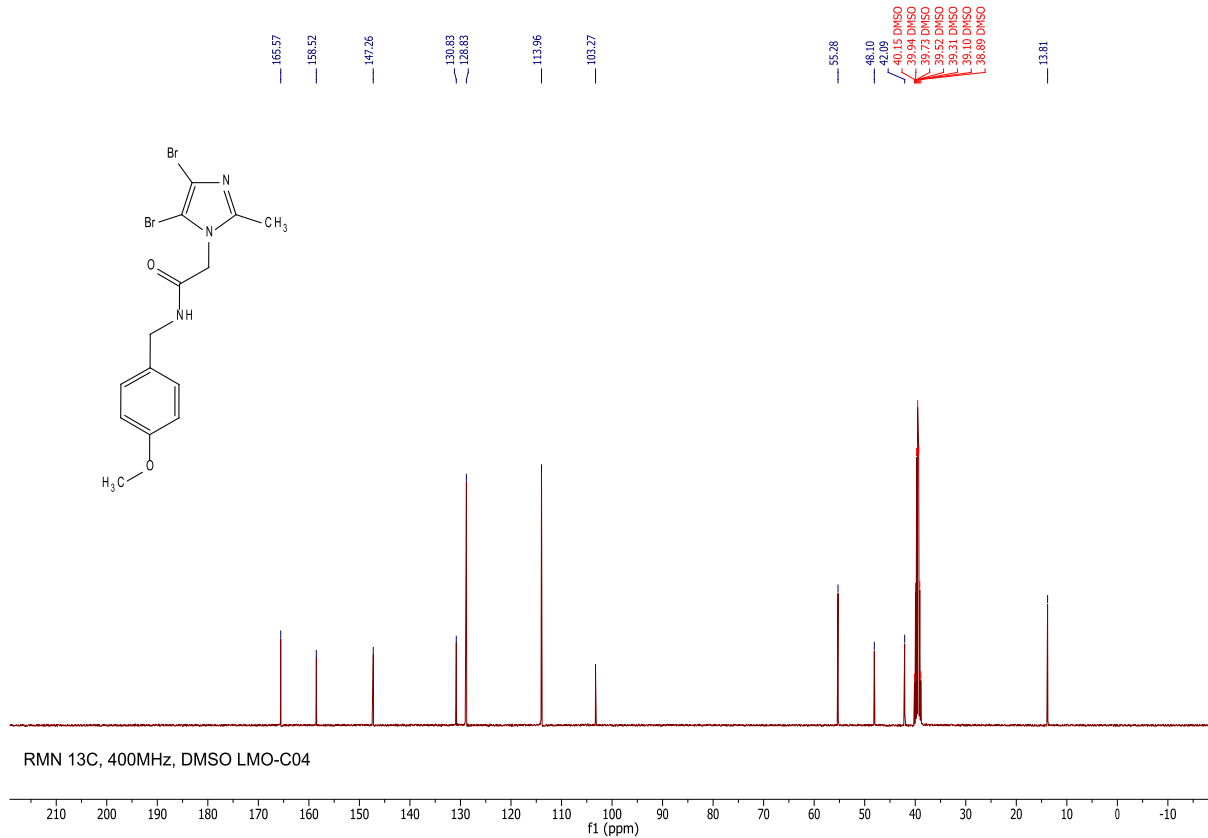

RMN 13C, 400MHz, DMSO LMO-C04

**7-Bromo-1-(4-methoxybenzyl)-5-methyl-1H-imidazo[1,5-a]imidazol-2(3H)-one (6).**

$^1\text{H}$  NMR (400 MHz,  $\text{CDCl}_3$ ):  $\delta$

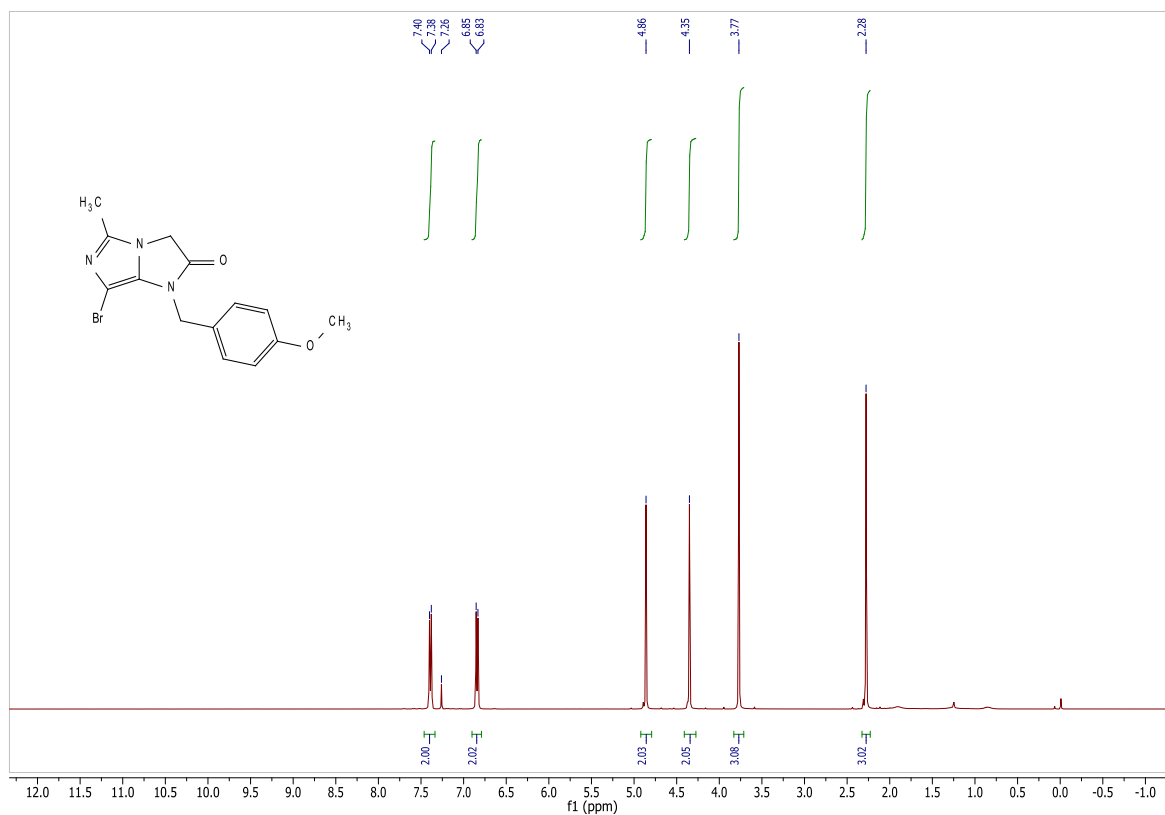

$^{13}\text{C}$  NMR (101 MHz,  $\text{CDCl}_3$ ):  $\delta$

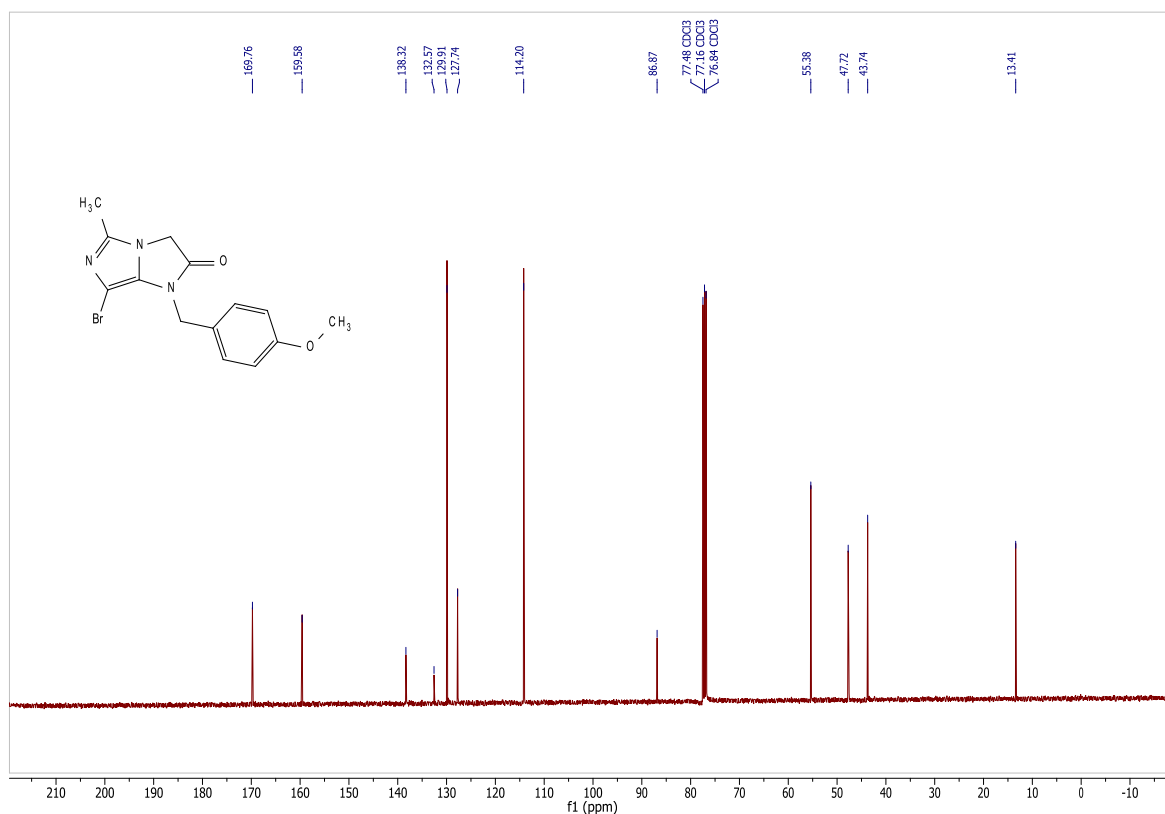

1-(4-Methoxybenzyl)-5-methyl-7-(p-tolyl)-1H-imidazo[1,5-a]imidazol-2(3H)-one (7).

$^1\text{H NMR}$  (400 MHz,  $\text{CDCl}_3$ ):  $\delta$

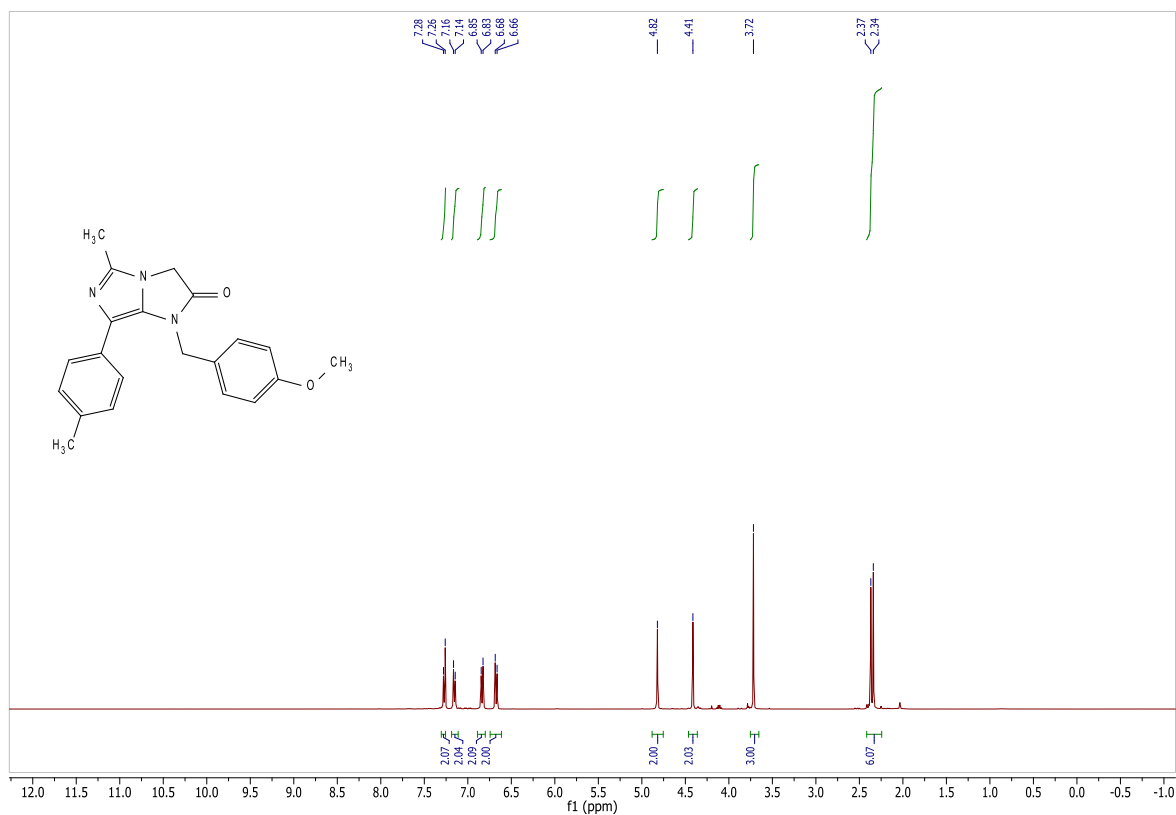

$^1\text{H NMR}$  (400 MHz,  $\text{CDCl}_3$ ):  $\delta$

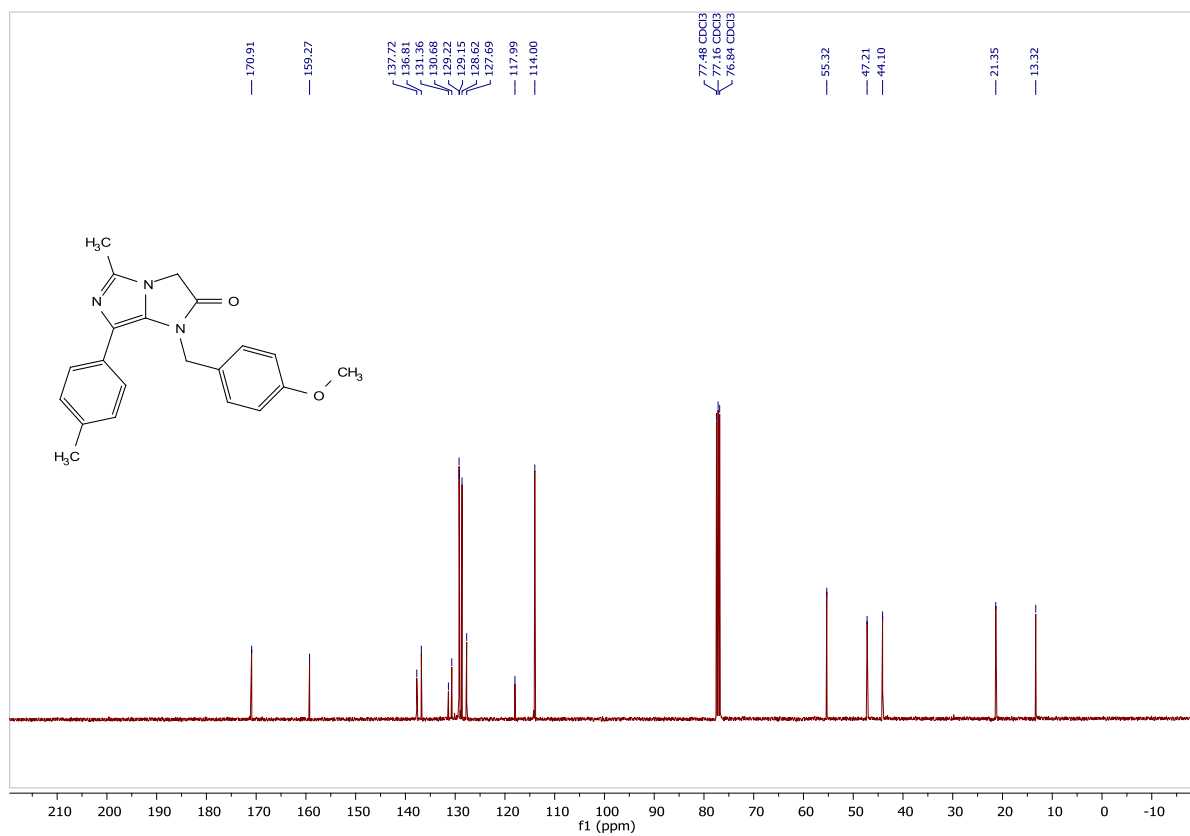

1-(4-Methoxybenzyl)-7-(4-methoxyphenyl)-5-methyl-1H-imidazo[1,5-a]imidazol-2(3H)-one. (8)

$^1\text{H}$  NMR (400 MHz,  $\text{CDCl}_3$ ):  $\delta$

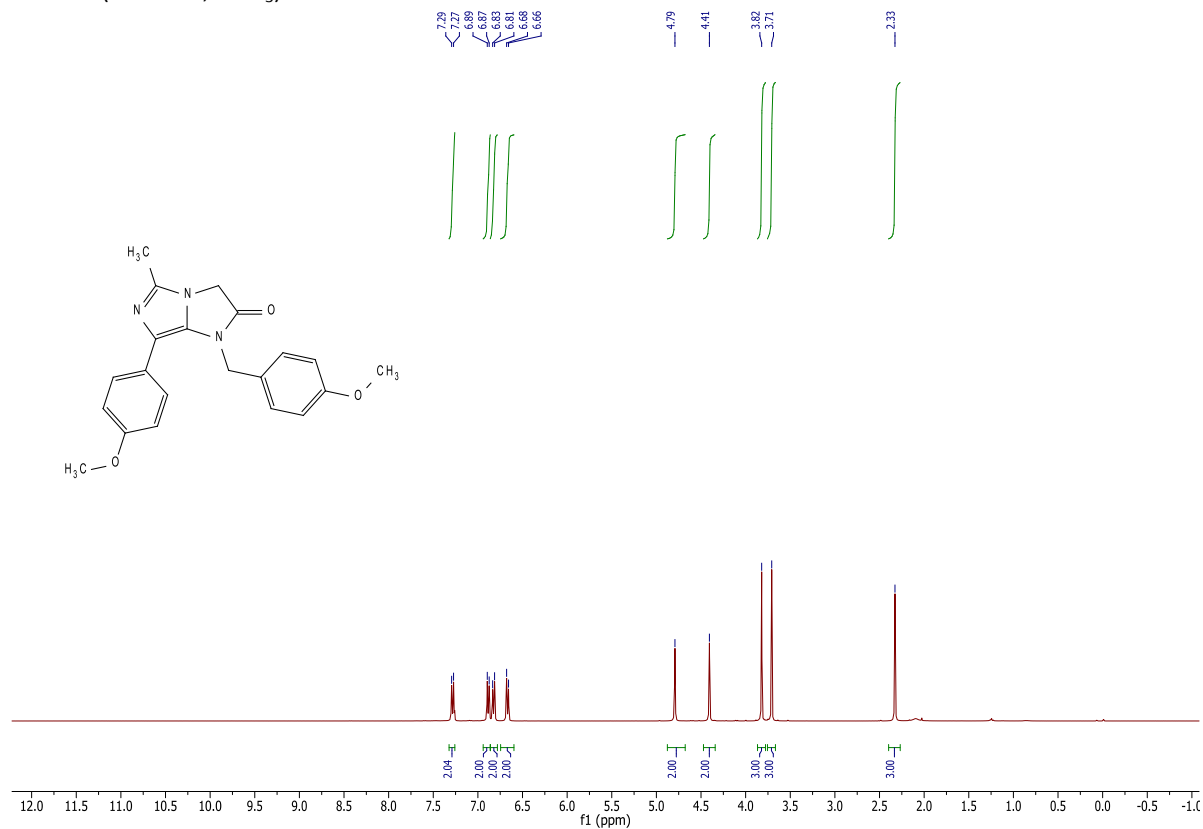

$^{13}\text{C}$  NMR (101 MHz,  $\text{CDCl}_3$ ):  $\delta$

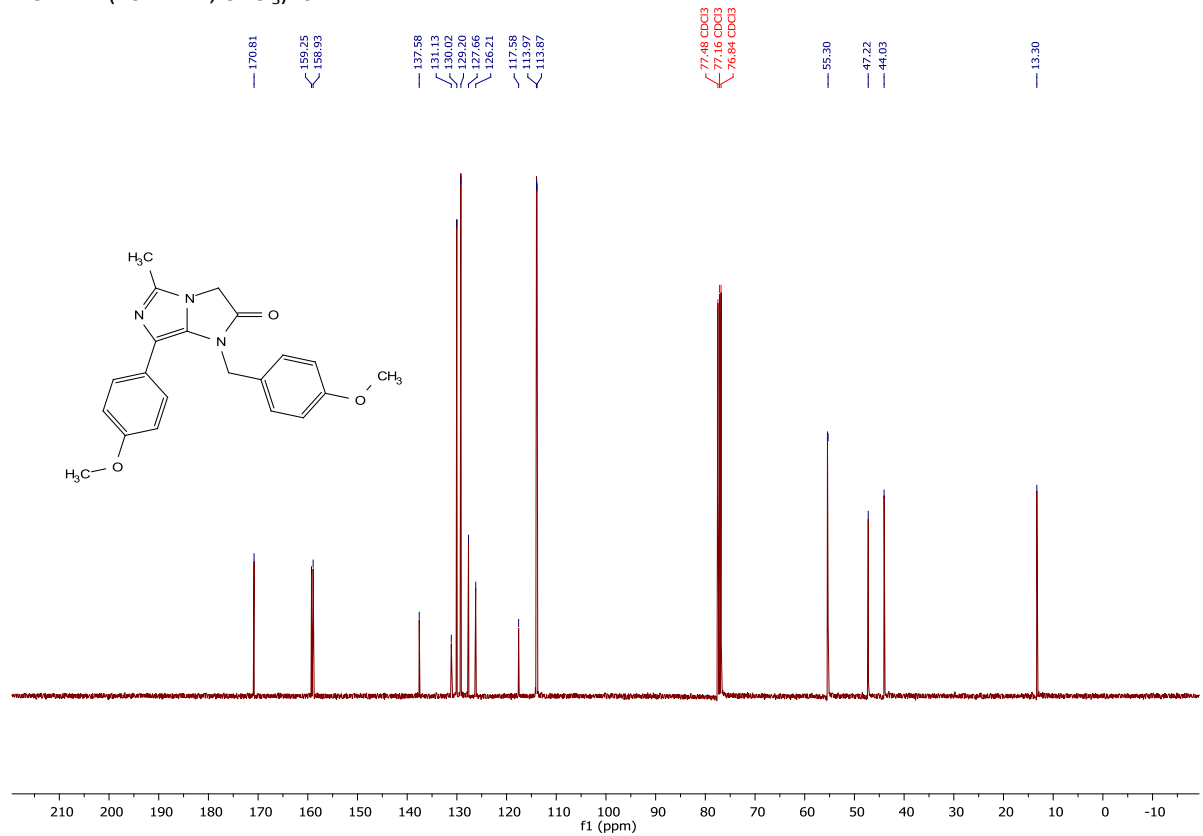

**7-(3,5-Dimethoxyphenyl)-1-(4-methoxybenzyl)-5-methyl-1H-imidazo[1,5-a]imidazol-2(3H)-one (9).**

$^1\text{H}$  NMR (400 MHz,  $\text{CDCl}_3$ ):  $\delta$

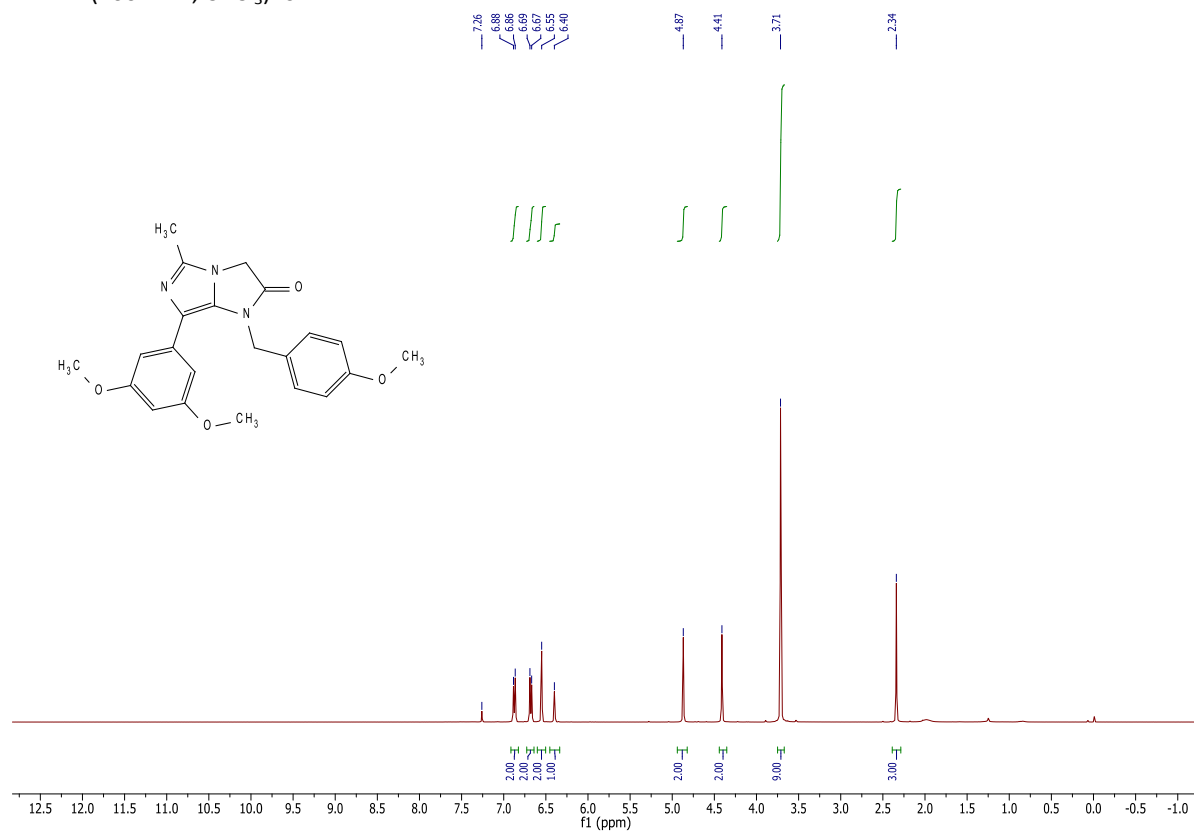

$^{13}\text{C}$  NMR (101 MHz,  $\text{CDCl}_3$ ):  $\delta$

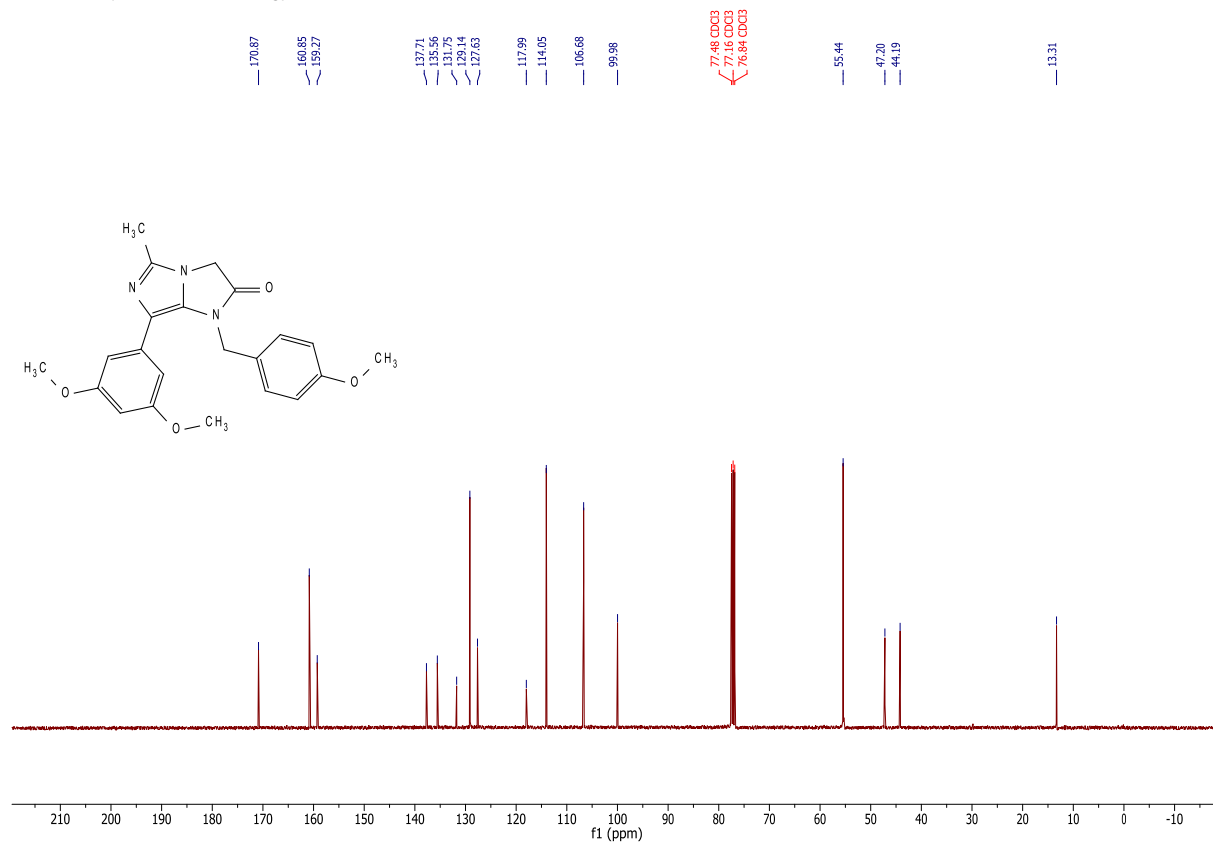



**Ethyl 4-(1-(4-methoxybenzyl)-5-methyl-2-oxo-2,3-dihydro-1H-imidazo[1,5-a]imidazol-7-yl)benzoate (10).**

$^1\text{H}$  NMR (400 MHz,  $\text{CDCl}_3$ ):  $\delta$

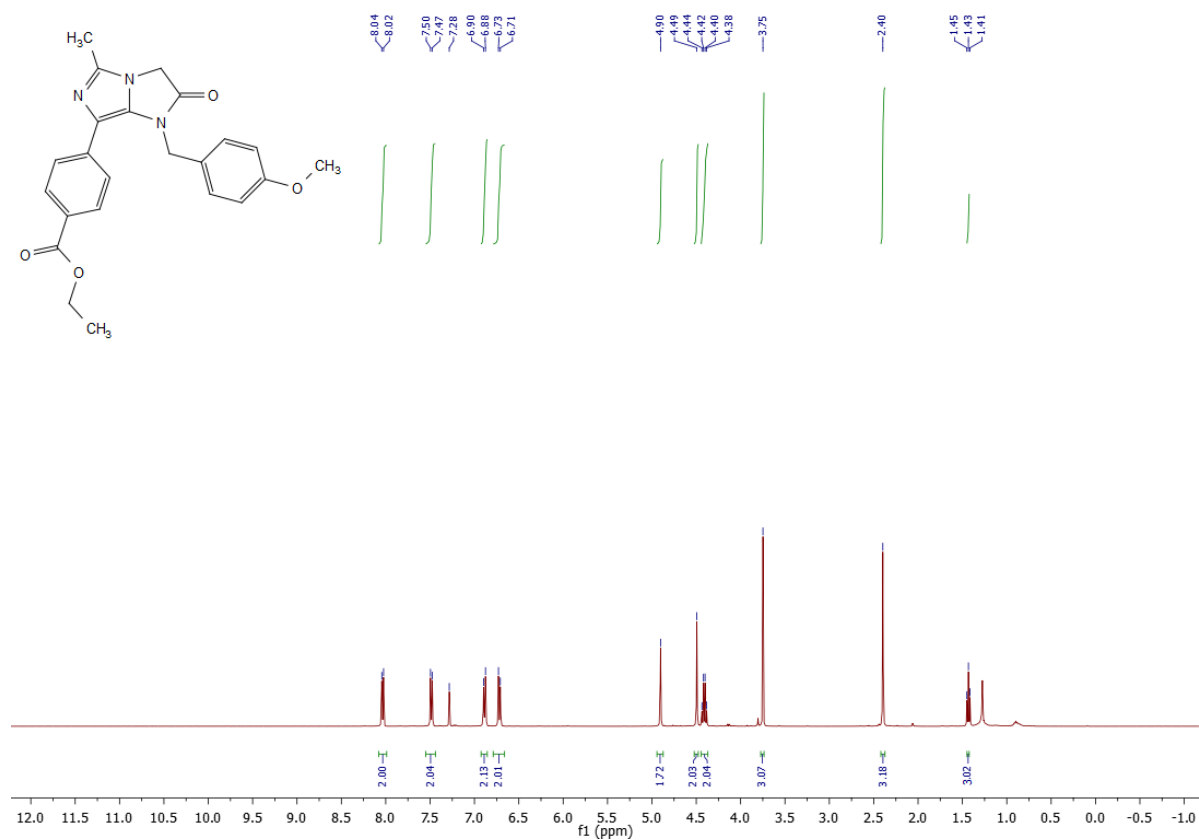

$^{13}\text{C}$  NMR (101 MHz,  $\text{CDCl}_3$ ):  $\delta$

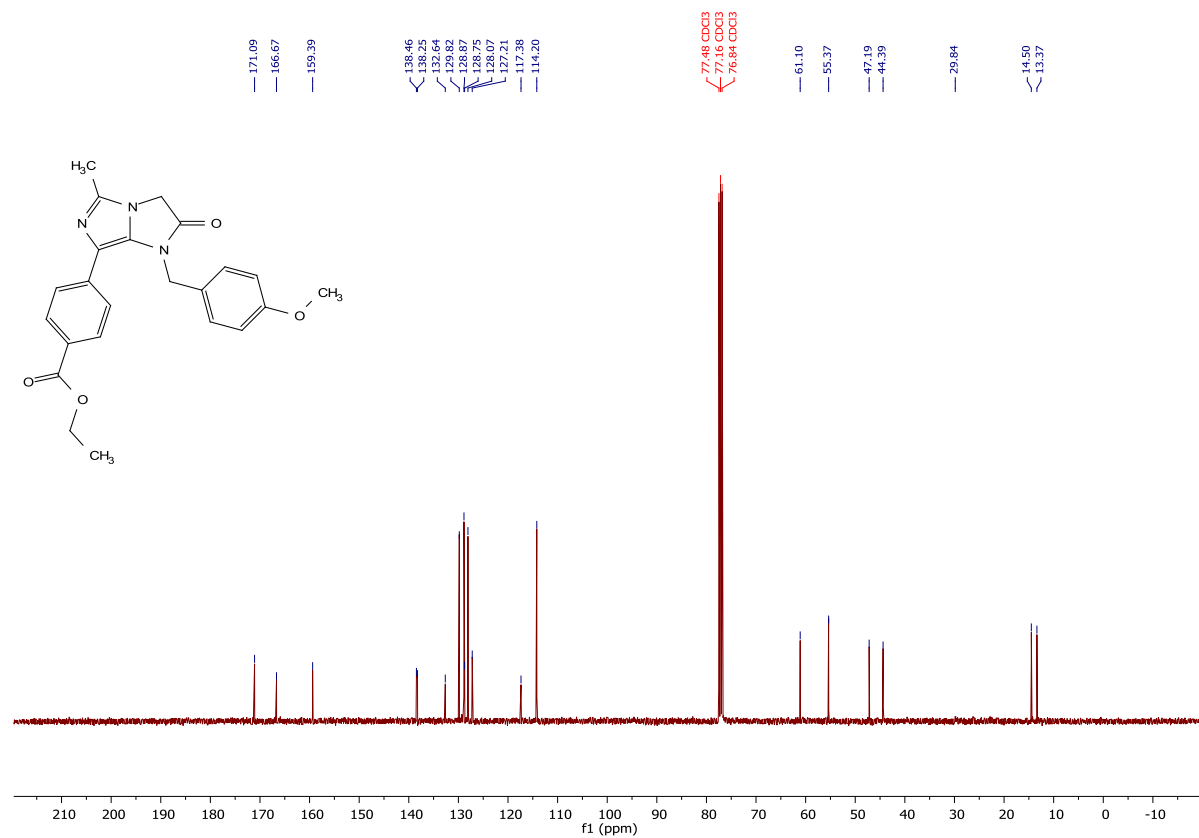

**1-(4-Methoxybenzyl)-5-methyl-7-(4-nitrophenyl)-1H-imidazo[1,5-a]imidazol-2(3H)-one (11).**

$^1\text{H}$  NMR (400 MHz,  $\text{CDCl}_3$ ):  $\delta$

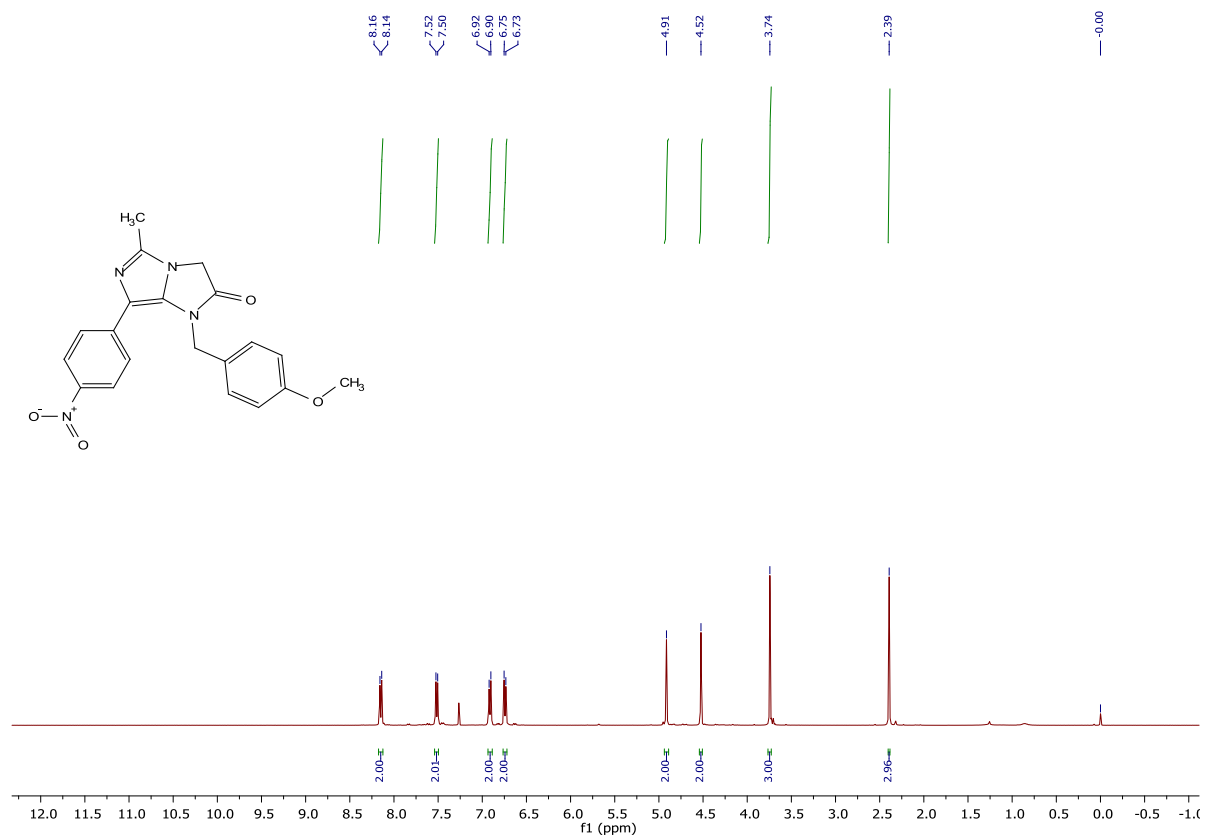

$^{13}\text{C}$  NMR (101 MHz,  $\text{CDCl}_3$ ):  $\delta$

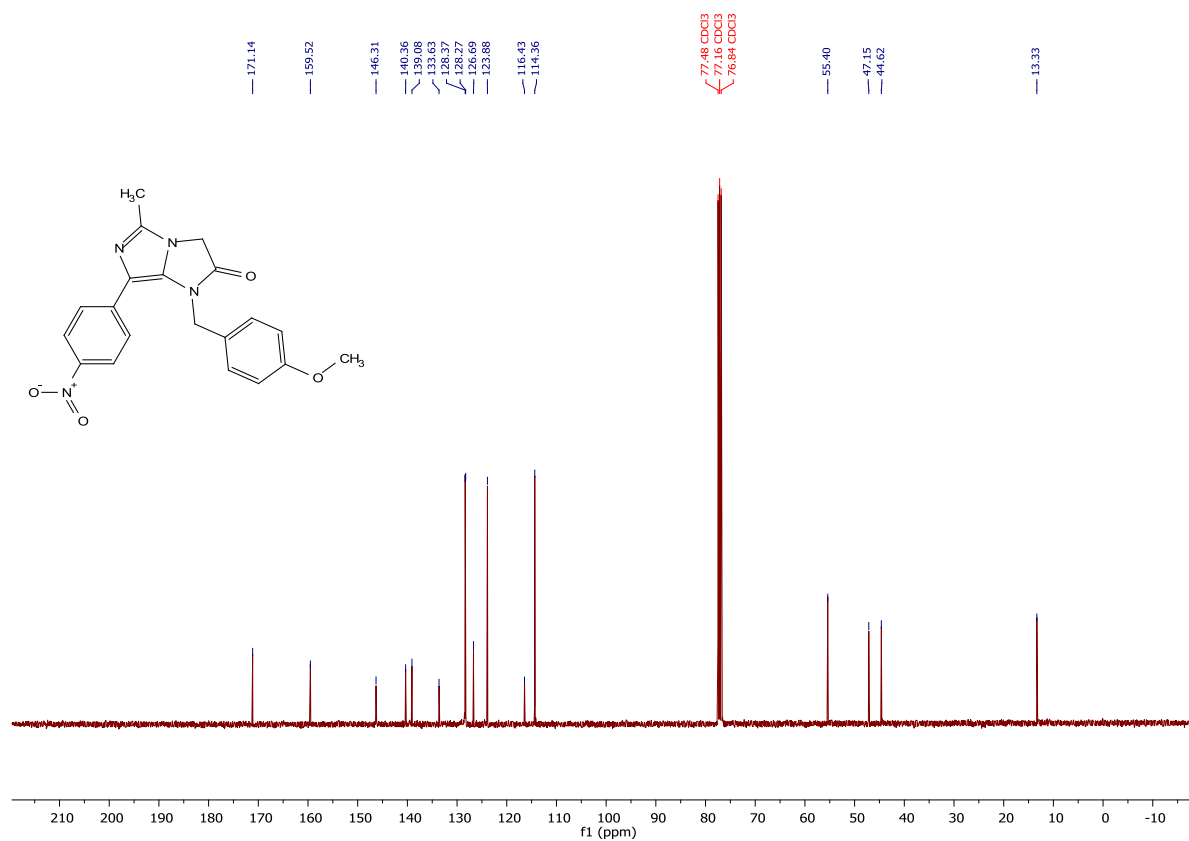

**1-(4-Methoxybenzyl)-5-methyl-7-(4-(trifluoromethyl)phenyl)-1H-imidazo[1,5-a]imidazol-2(3H)-one (12).**

$^1\text{H}$  NMR (400 MHz,  $\text{CDCl}_3$ ):  $\delta$

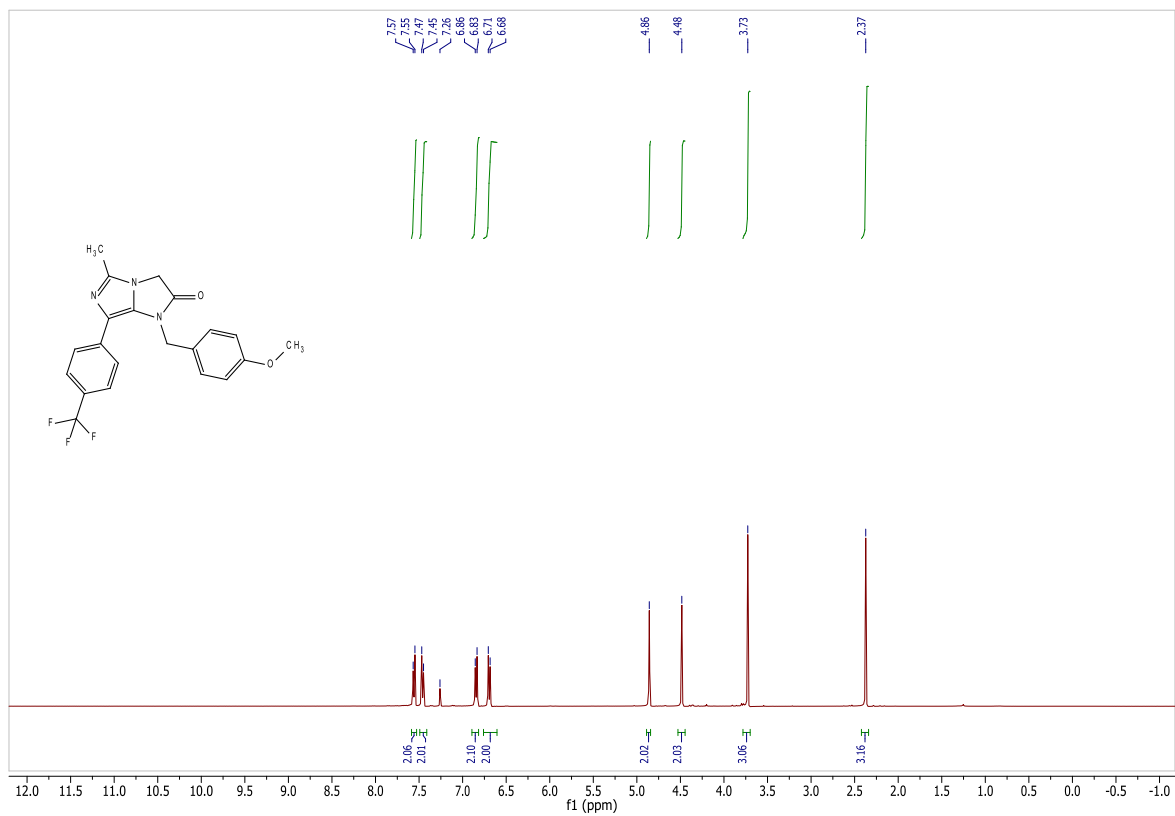

$^{13}\text{C}$  NMR (101 MHz,  $\text{CDCl}_3$ ):  $\delta$

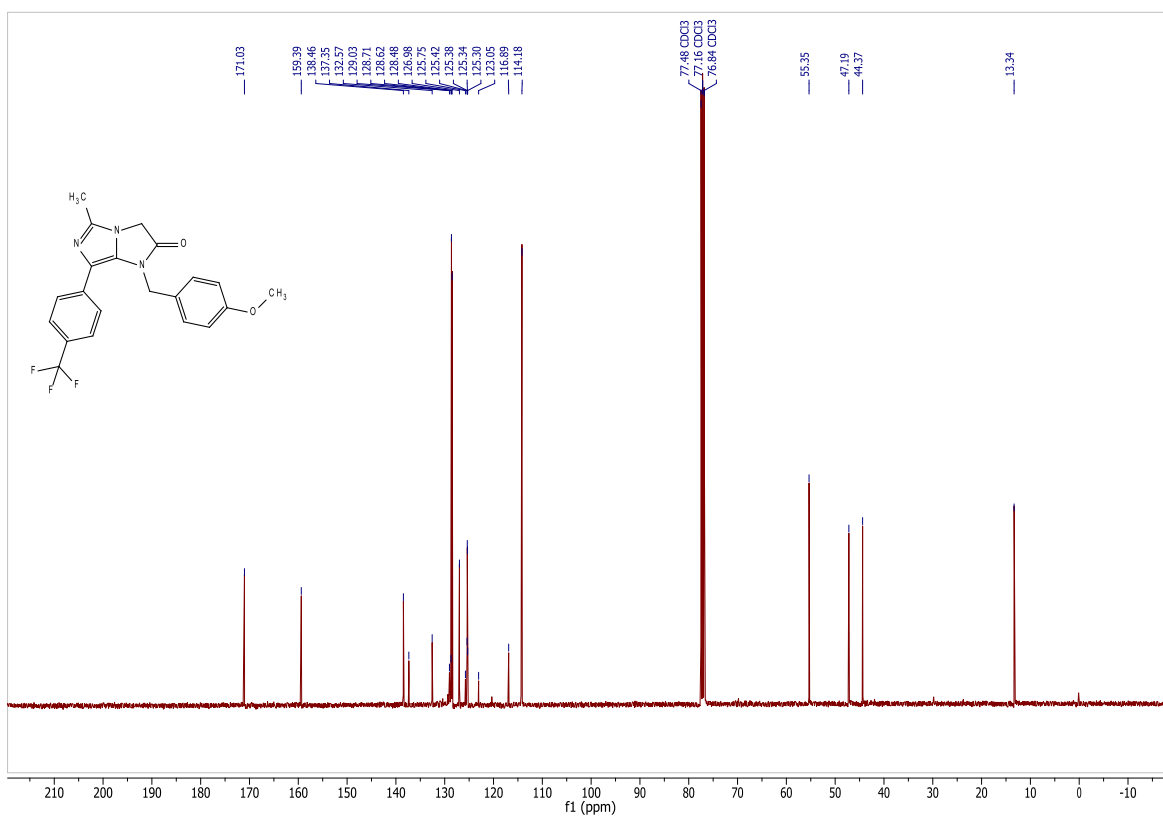

**4-(1-(4-Methoxybenzyl)-5-methyl-2-oxo-2,3-dihydro-1H-imidazo[1,5-a]imidazol-7-yl)benzonitrile (13).**

$^1\text{H}$  NMR (400 MHz,  $\text{CDCl}_3$ ):  $\delta$

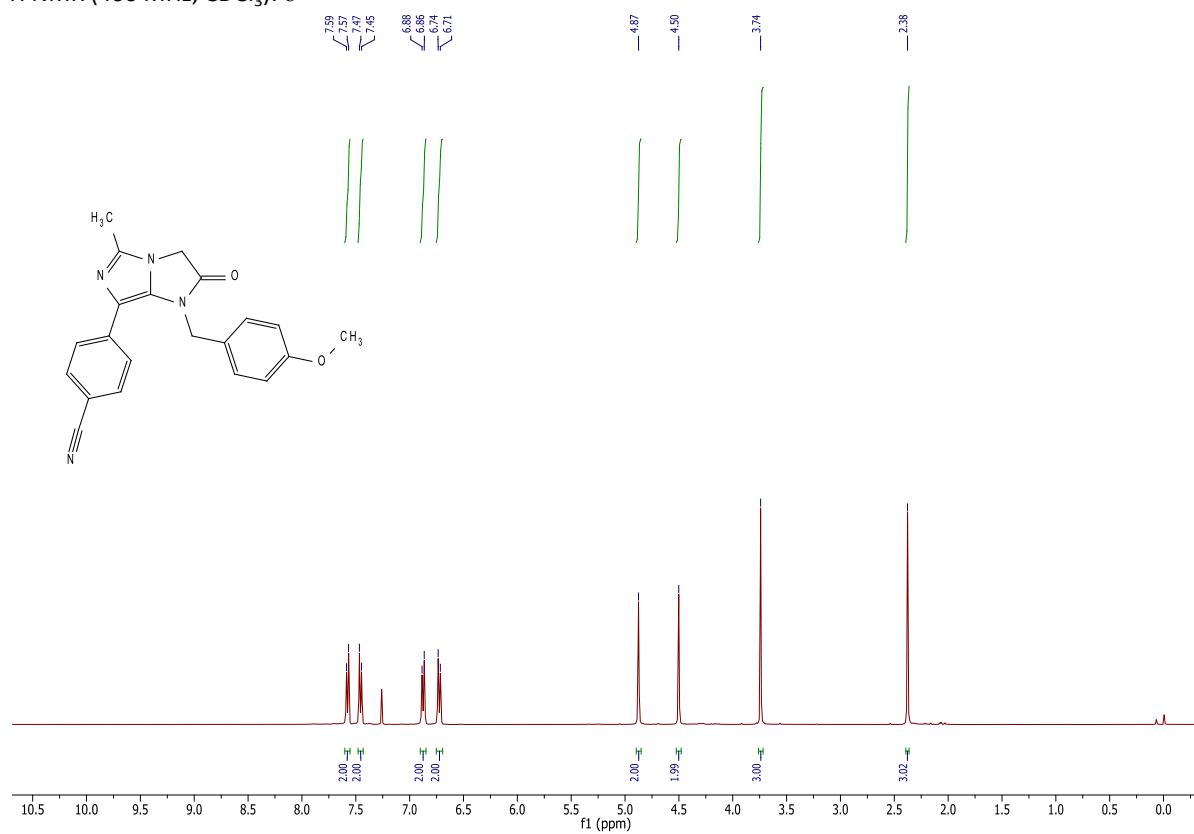

$^{13}\text{C}$  NMR (101 MHz,  $\text{CDCl}_3$ ):  $\delta$

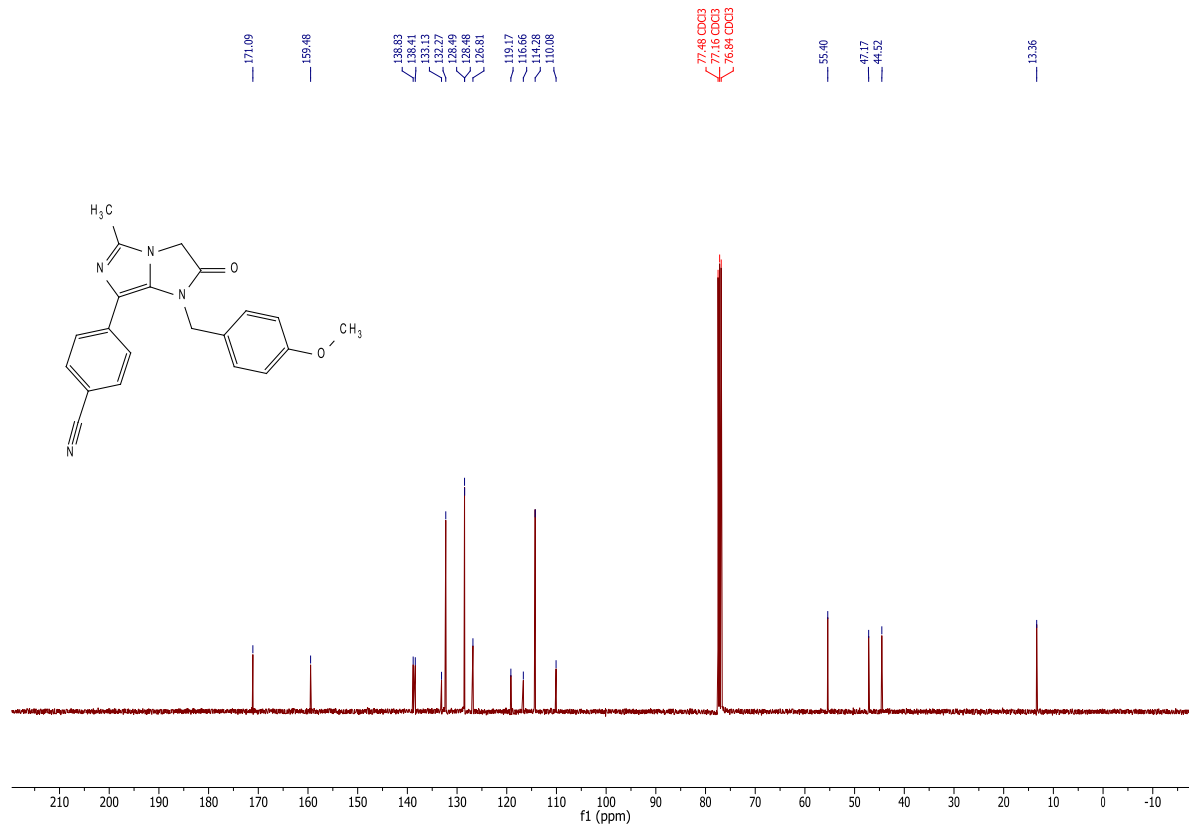

**1-(4-Methoxybenzyl)-5-methyl-7-phenyl-1H-imidazo[1,5-a]imidazol-2(3H)-one (14).**

$^1\text{H}$  NMR (400 MHz,  $\text{CDCl}_3$ ):  $\delta$

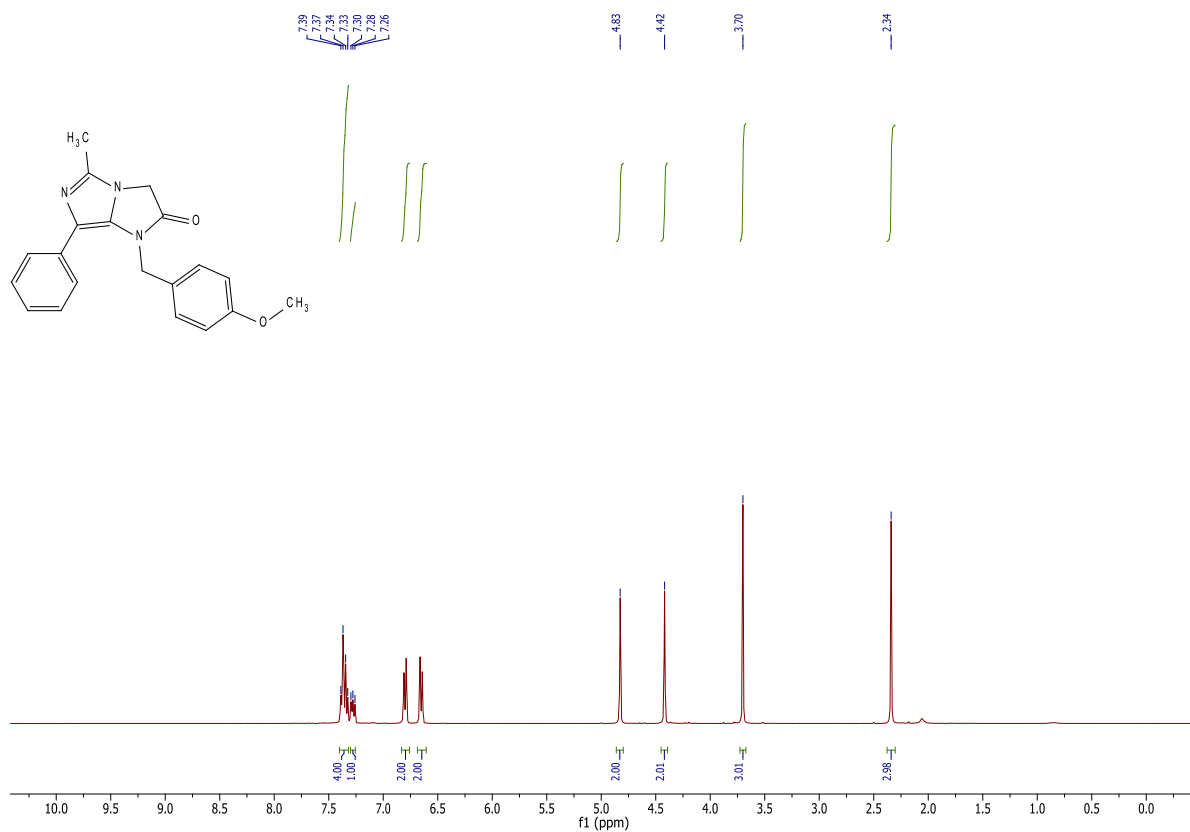

$^{13}\text{C}$  NMR (101 MHz,  $\text{CDCl}_3$ ):  $\delta$

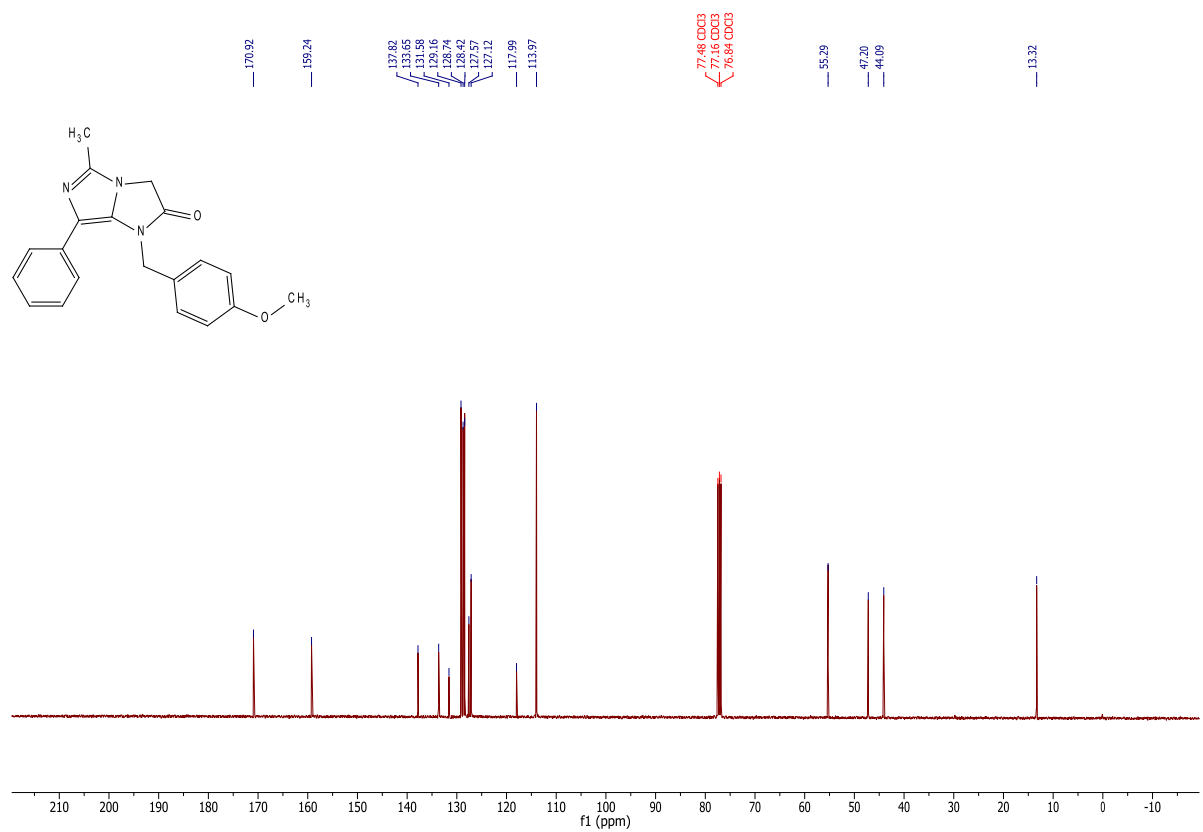

1-(4-Methoxybenzyl)-5-methyl-7-(m-tolyl)-1H-imidazo[1,5-a]imidazol-2(3H)-one (15).

$^1\text{H}$  NMR (400 MHz,  $\text{CDCl}_3$ ):  $\delta$

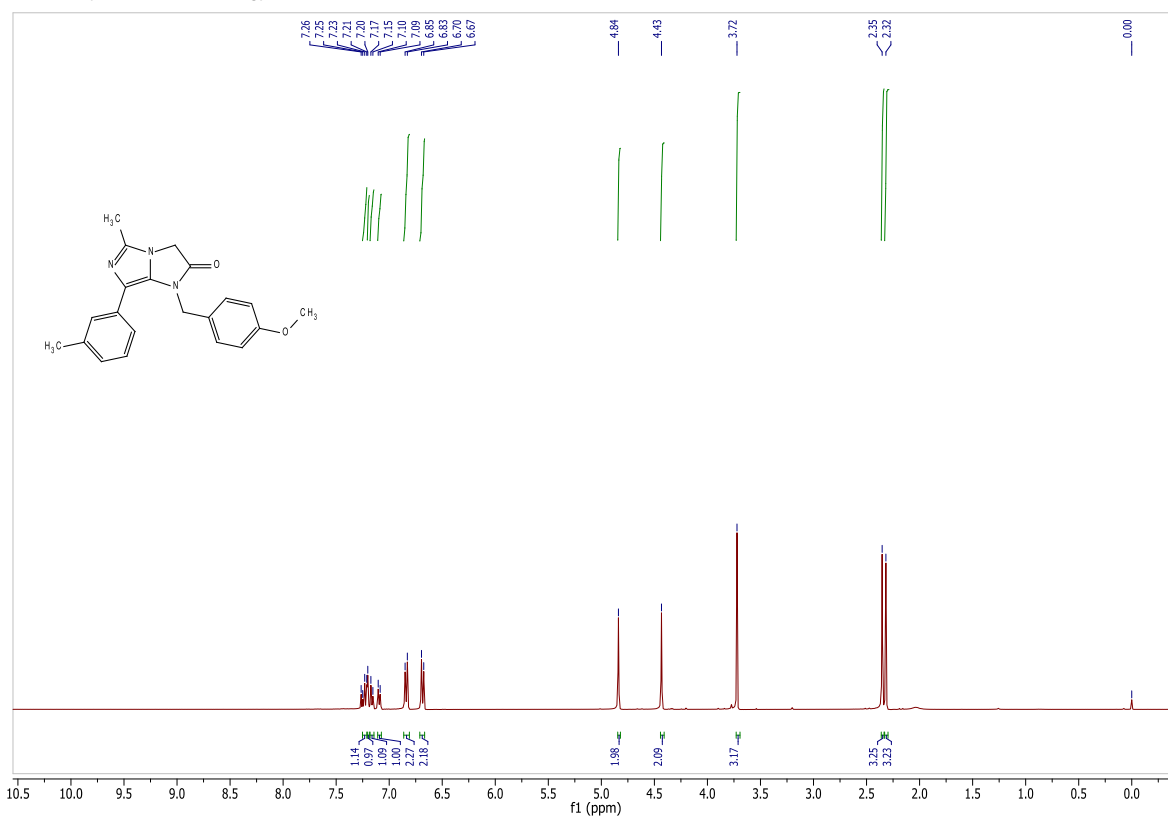

$^{13}\text{C}$  NMR (101 MHz,  $\text{CDCl}_3$ ):  $\delta$

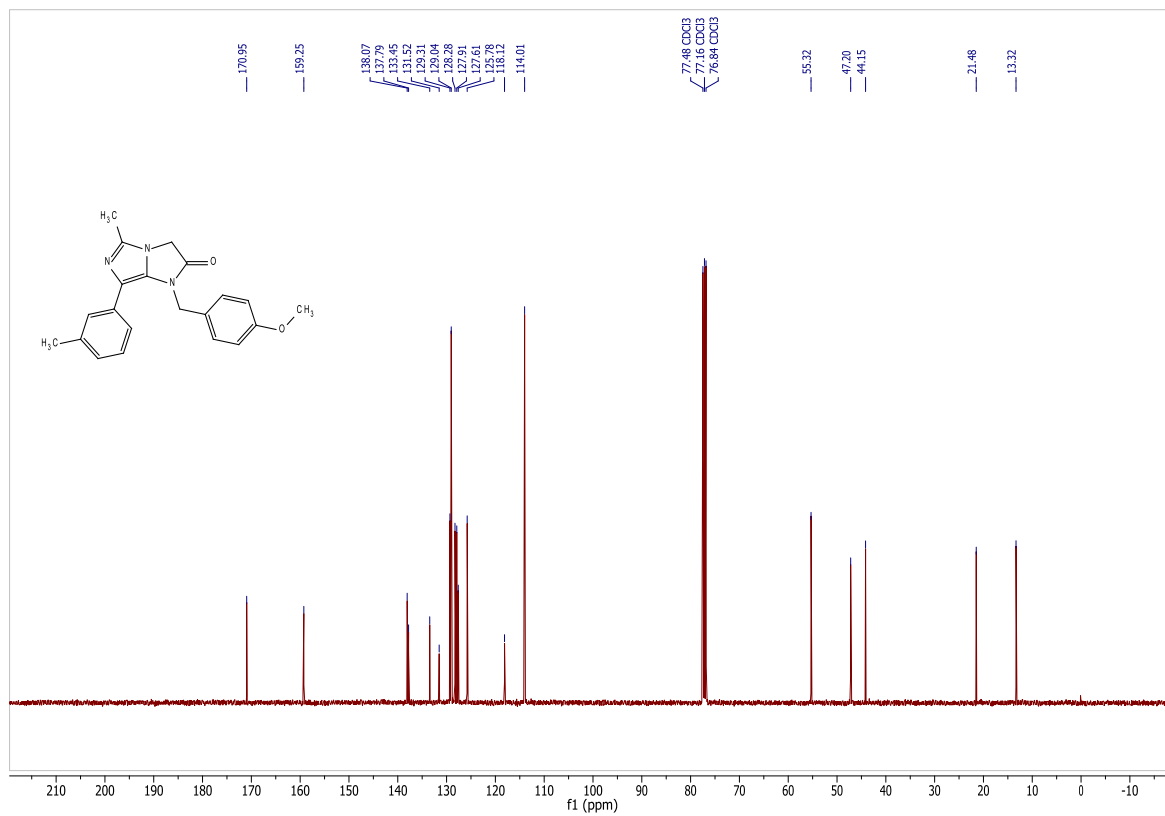

**1-(4-Methoxybenzyl)-5-methyl-7-(3-nitrophenyl)-1H-imidazo[1,5-a]imidazol-2(3H)-one (16).**

$^1\text{H}$  NMR (400 MHz,  $\text{CDCl}_3$ ):  $\delta$

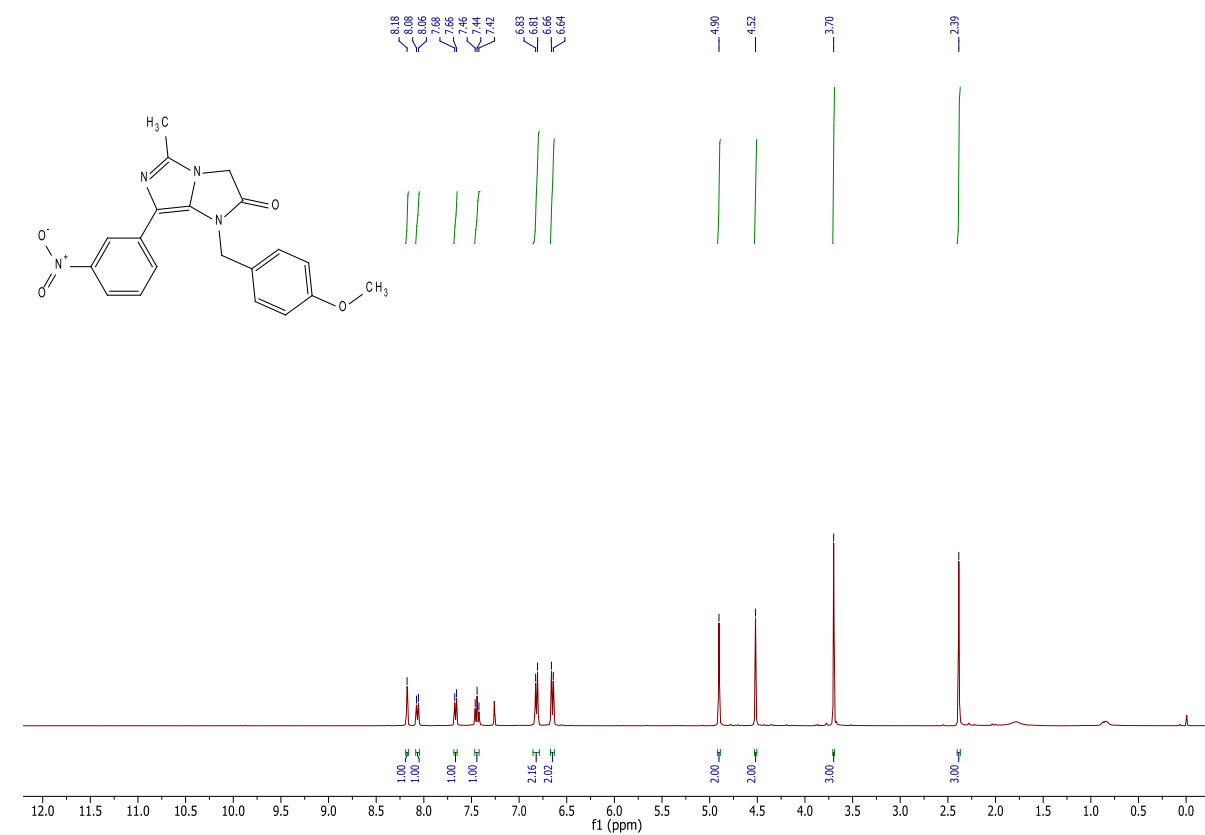

$^{13}\text{C}$  NMR (101 MHz,  $\text{CDCl}_3$ ):  $\delta$

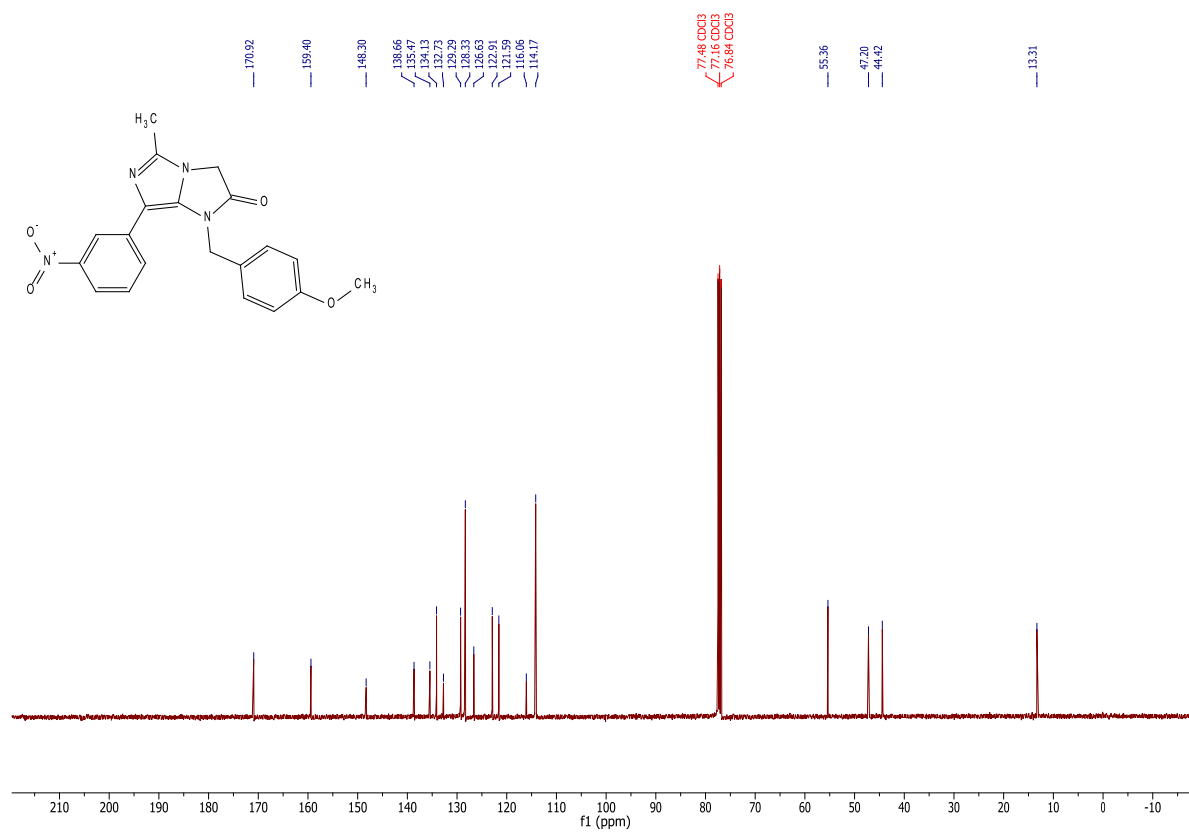

**1-(4-Methoxybenzyl)-5-methyl-7-(3-(trifluoromethyl)phenyl)-1H-imidazo[1,5-a]imidazol-2(3H)-one (17).**

$^1\text{H}$  NMR (400 MHz,  $\text{CDCl}_3$ ):  $\delta$

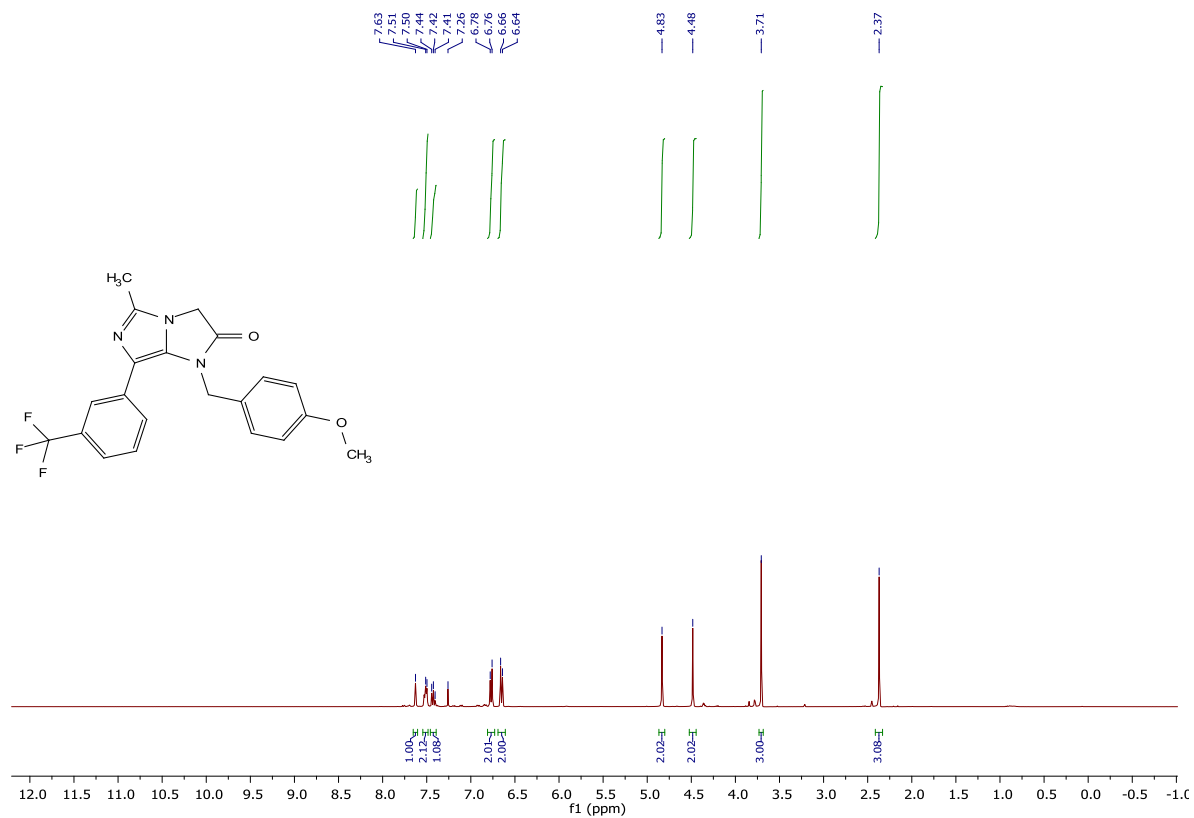

$^{13}\text{C}$  NMR (101 MHz,  $\text{CDCl}_3$ ):  $\delta$

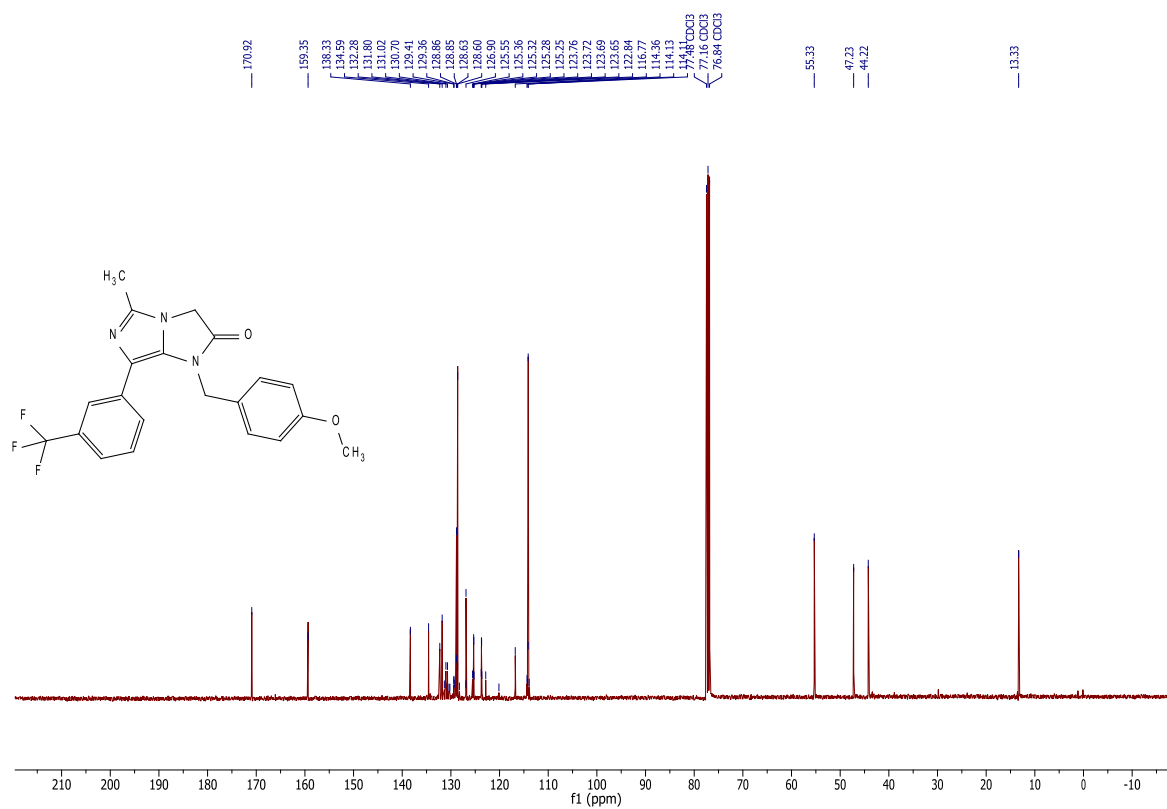



**3-(1-(4-Methoxybenzyl)-5-methyl-2-oxo-2,3-dihydro-1H-imidazo[1,5-a]imidazol-7-yl)benzotrile (18).**

$^1\text{H}$  NMR (400 MHz,  $\text{CDCl}_3$ ):  $\delta$

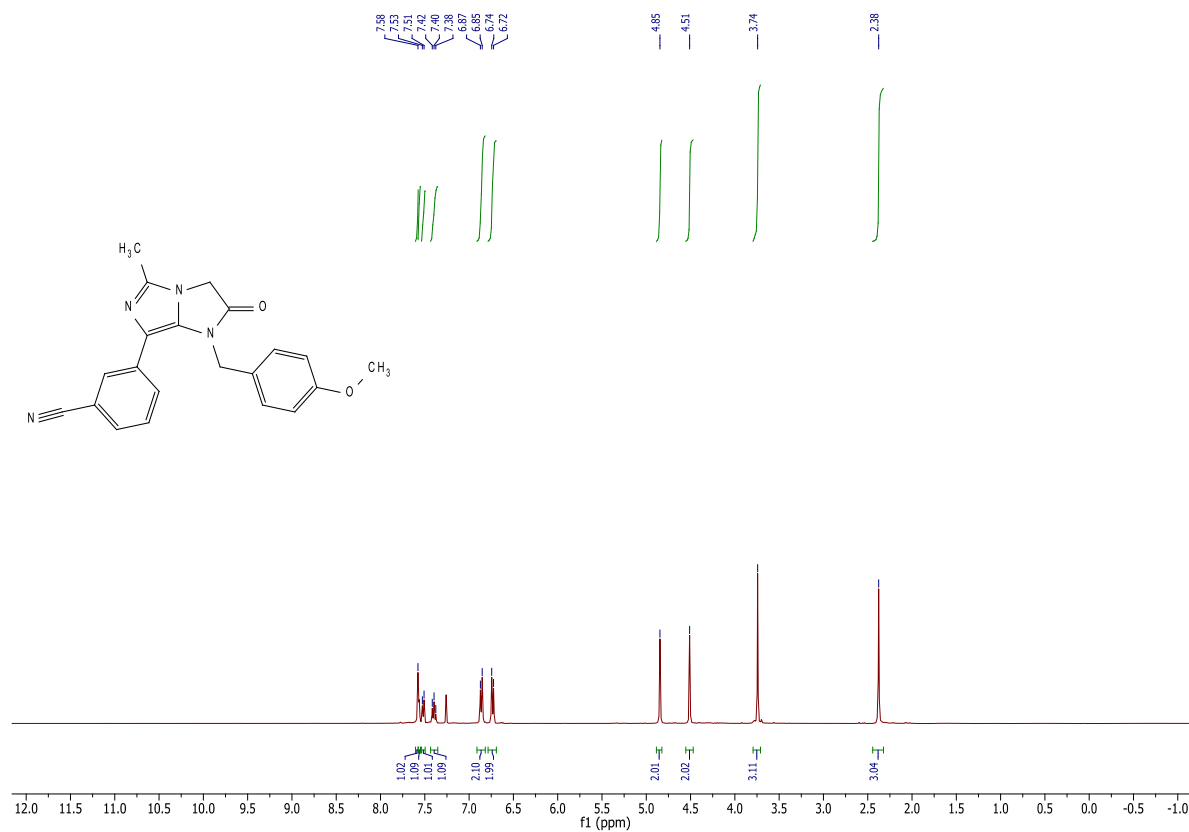

$^{13}\text{C}$  NMR (101 MHz,  $\text{CDCl}_3$ ):  $\delta$

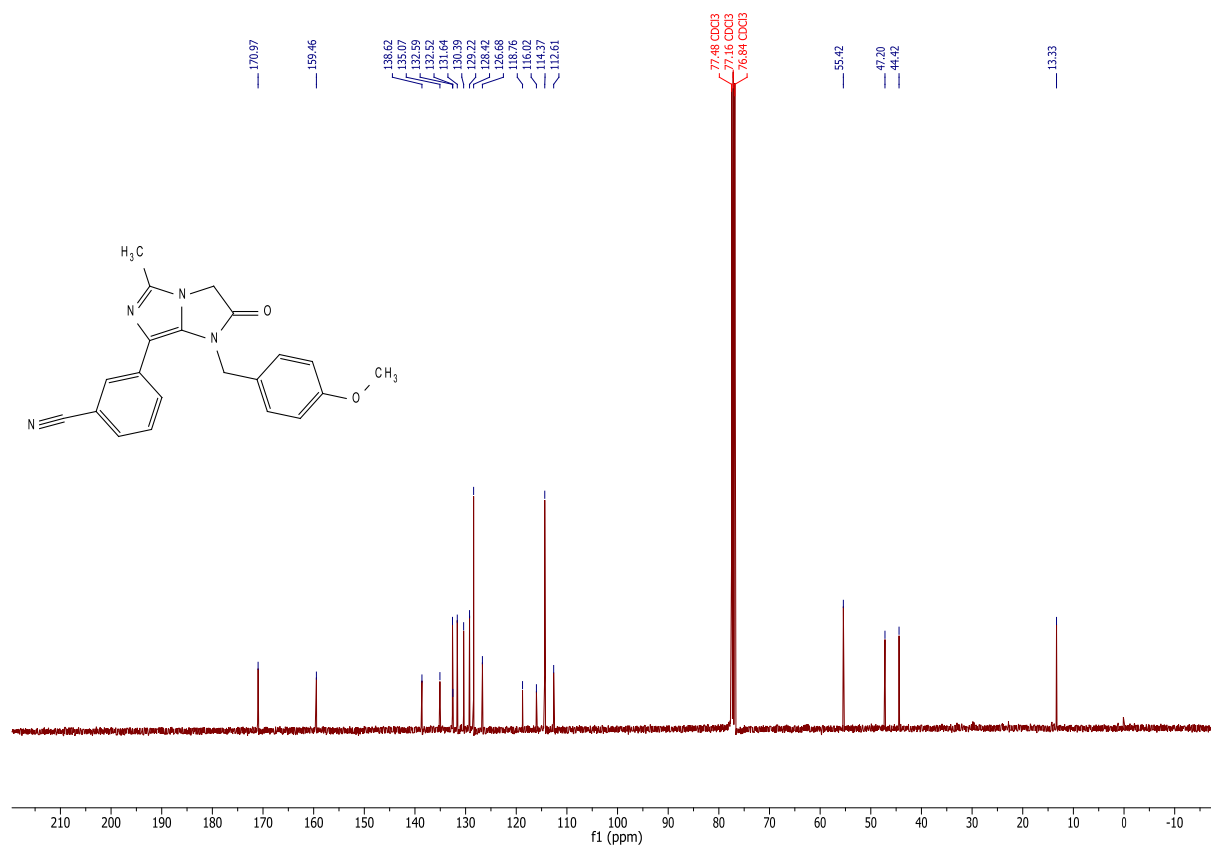

**1-(4-Methoxybenzyl)-5-methyl-1H-imidazo[1,5-a]imidazol-2(3H)-one (19).**

$^1\text{H}$  NMR (400 MHz,  $\text{CDCl}_3$ ):  $\delta$

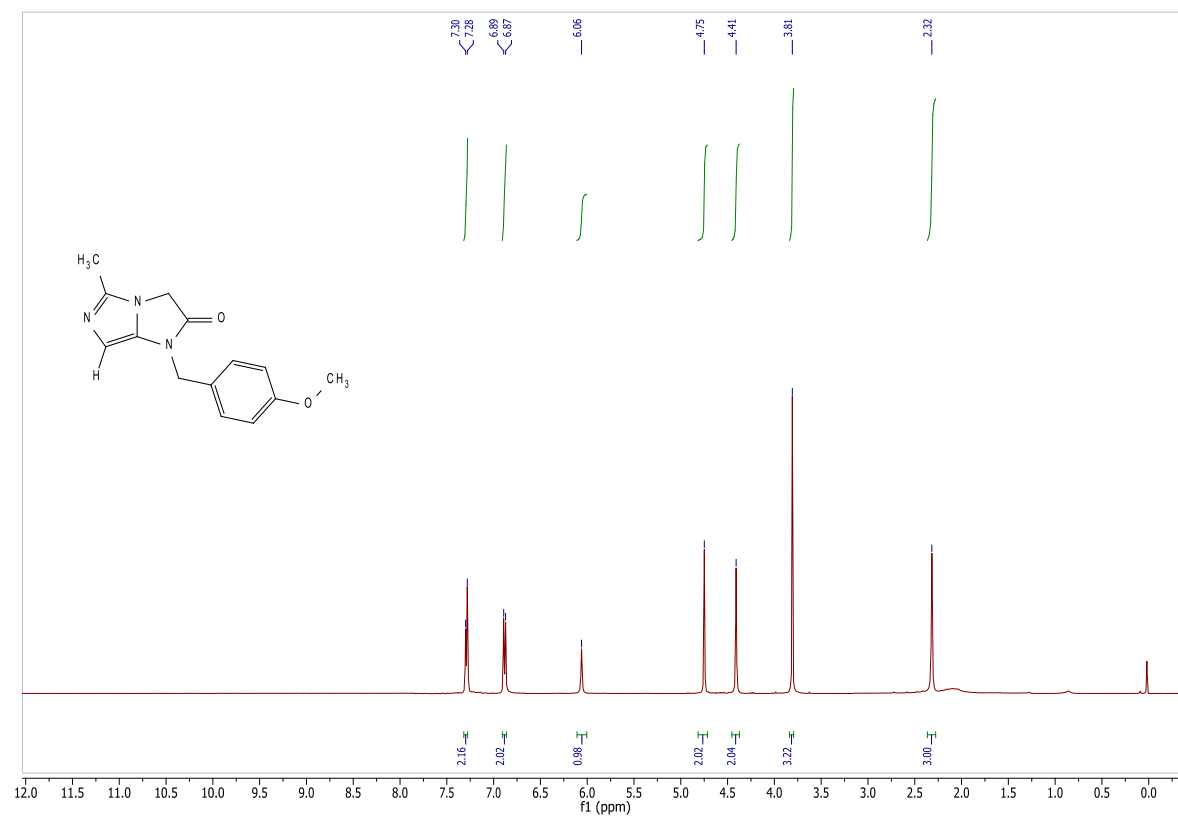

$^{13}\text{C}$  NMR (101 MHz,  $\text{CDCl}_3$ ):  $\delta$

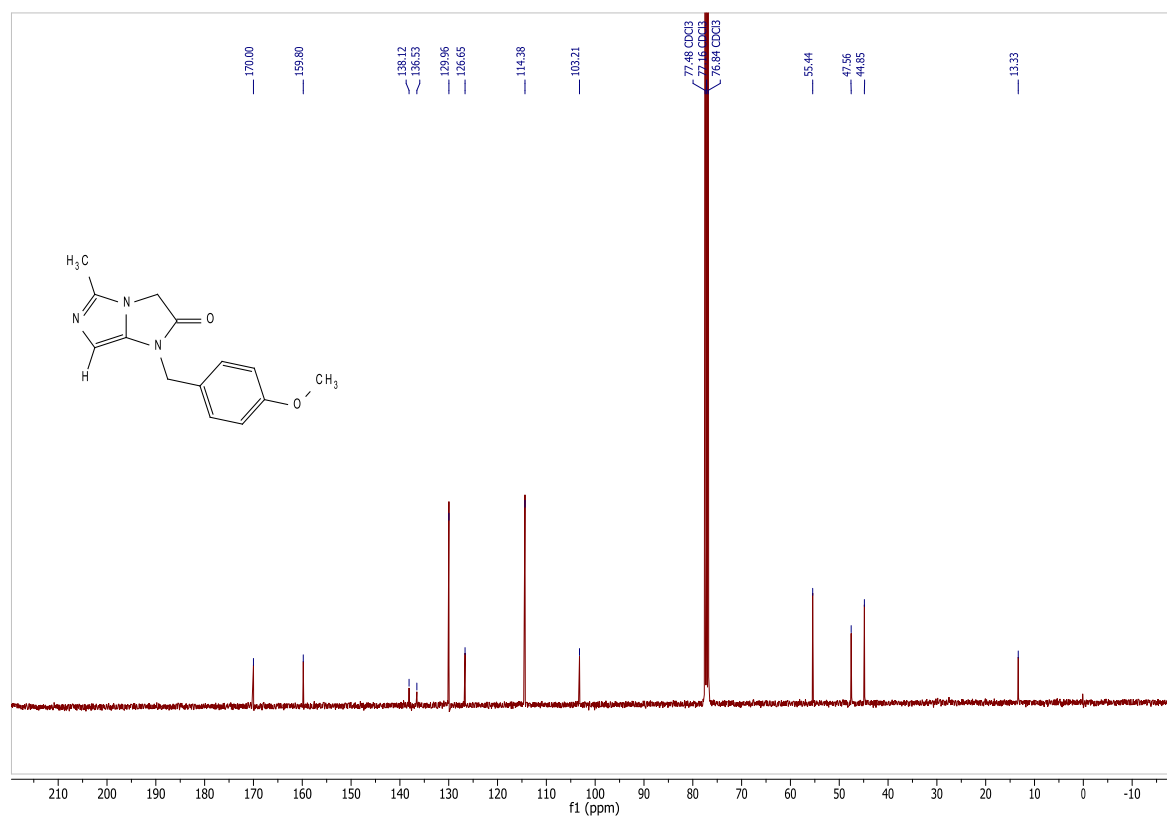

**(E)-1-(4-Methoxybenzyl)-5-methyl-7-styryl-1H-imidazo[1,5-a]imidazol-2(3H)-one (20).**

$^1\text{H}$  NMR (400 MHz,  $\text{CDCl}_3$ ):  $\delta$

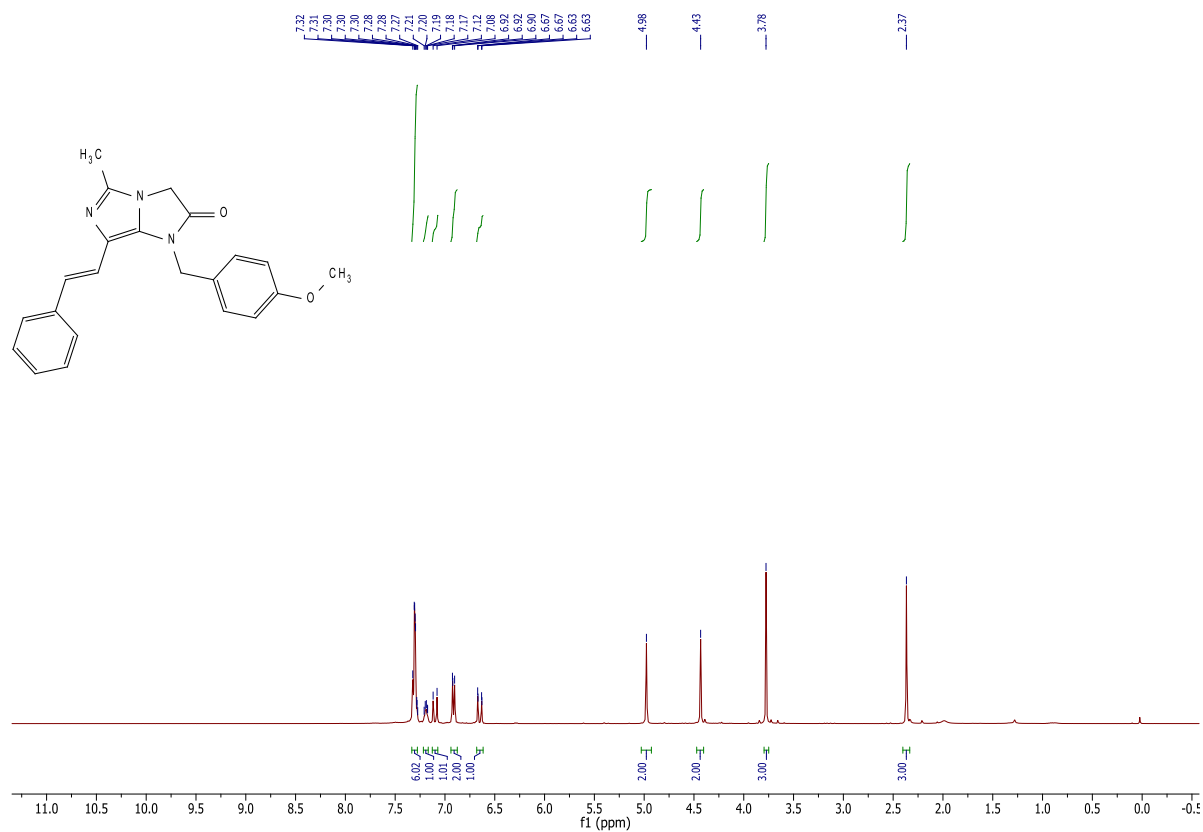

$^{13}\text{C}$  NMR (101 MHz,  $\text{CDCl}_3$ ):  $\delta$

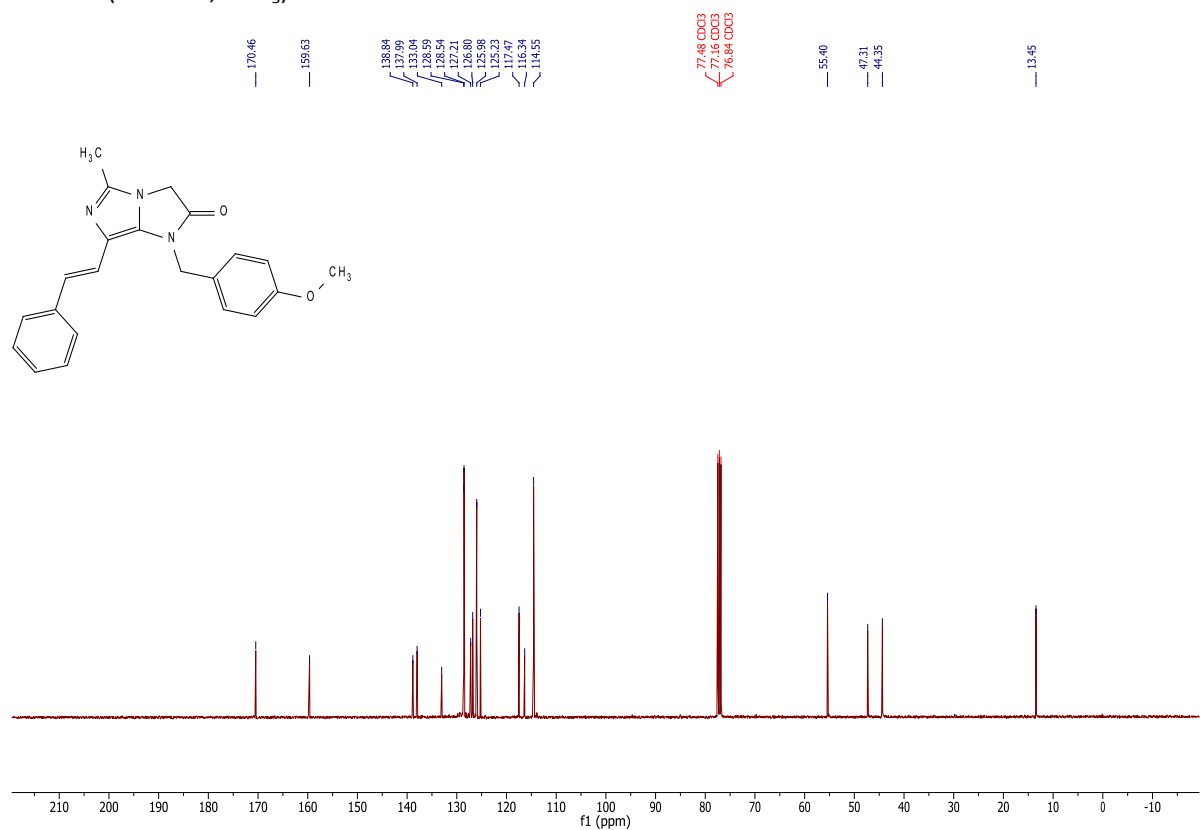

**7-(Furan-3-yl)-1-(4-methoxybenzyl)-5-methyl-1H-imidazo[1,5-a]imidazol-2(3H)-one (21).**

$^1\text{H}$  NMR (400 MHz,  $\text{CDCl}_3$ ):  $\delta$

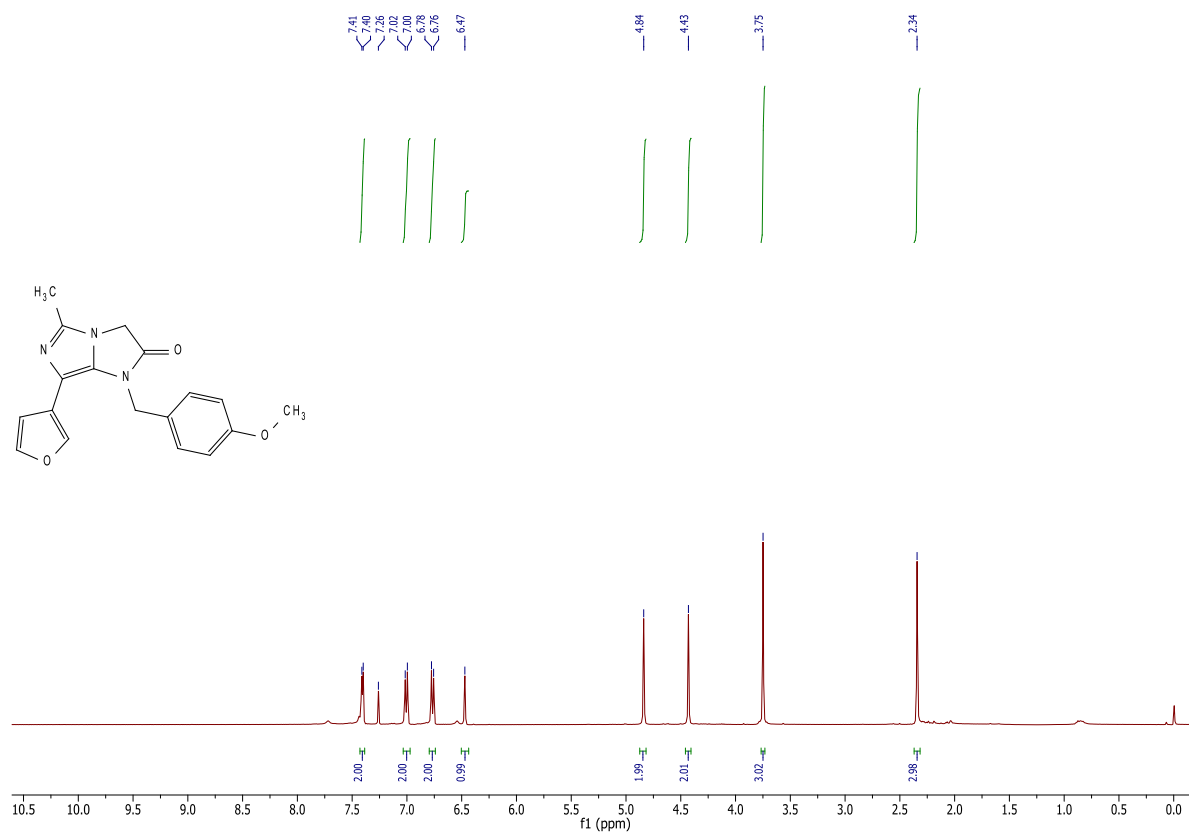

$^{13}\text{C}$  NMR (101 MHz,  $\text{CDCl}_3$ ):  $\delta$

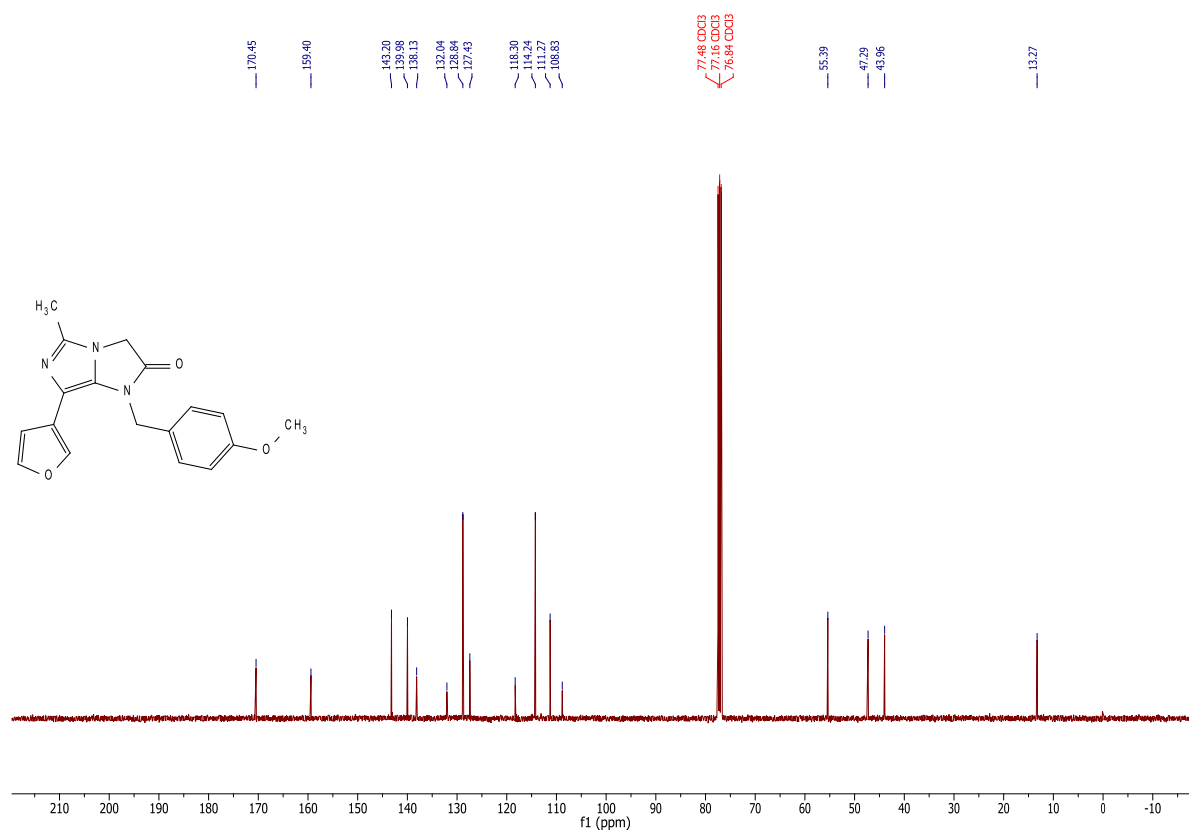

1-(4-Methoxybenzyl)-5-methyl-7-(thiophen-3-yl)-1H-imidazo[1,5-a]imidazol-2(3H)-one (22).

$^1\text{H}$  NMR (400 MHz,  $\text{CDCl}_3$ ):  $\delta$

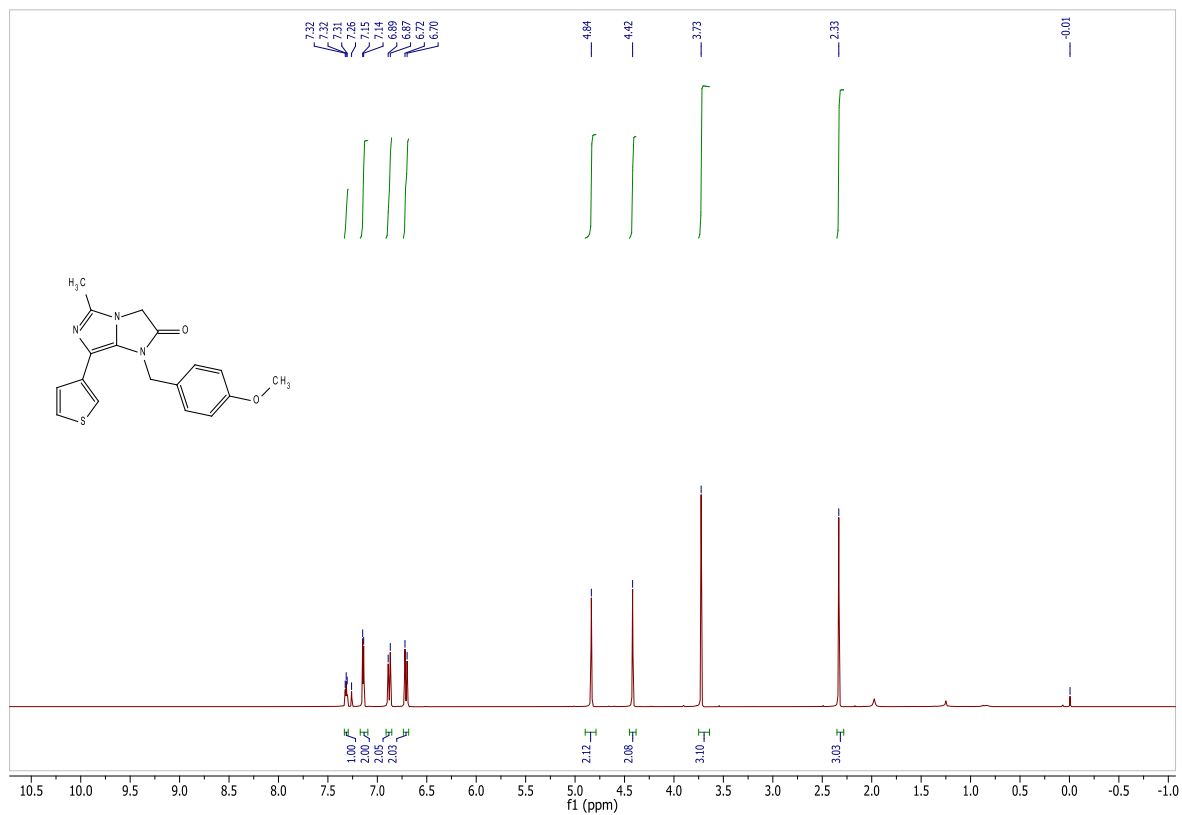

$^{13}\text{C}$  NMR (101 MHz,  $\text{CDCl}_3$ ):  $\delta$

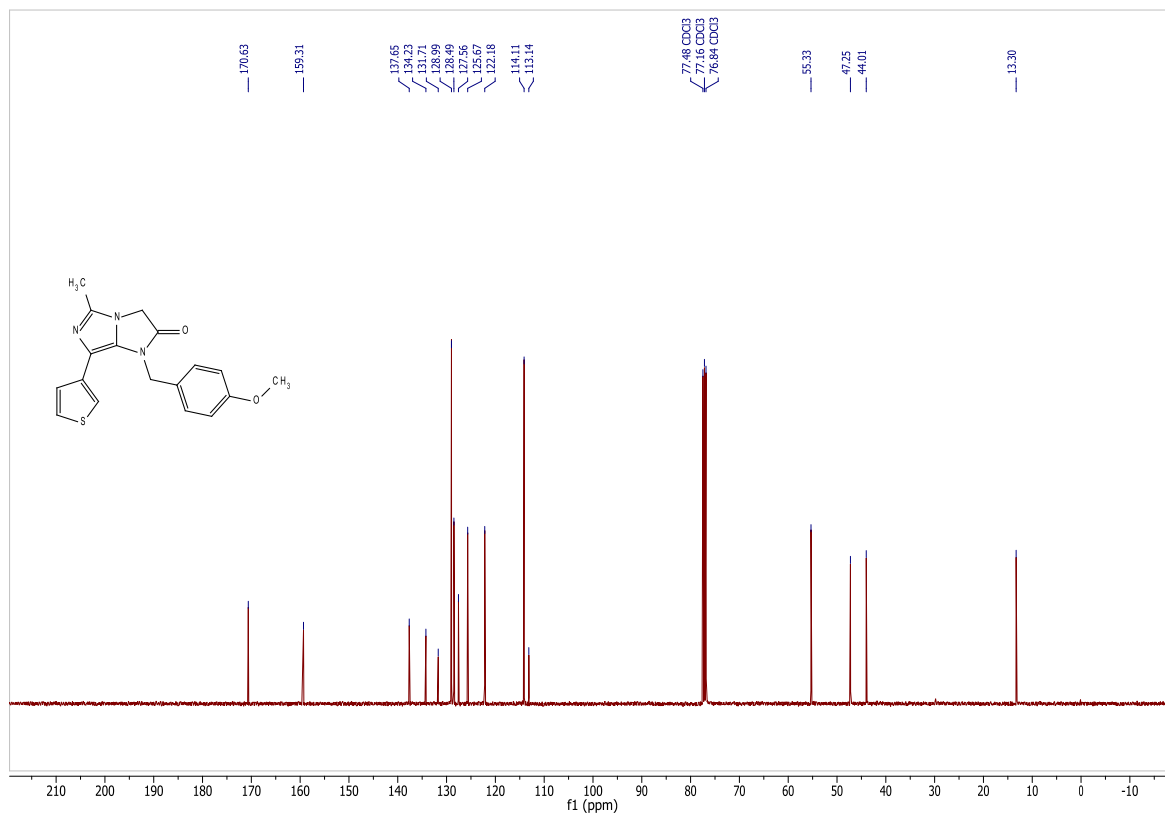

Supplement: c5ra25520a1.pdf [file c5ra25520a1.pdf]
